# Supplementary material for: Oxovanadium(v)-catalyzed oxidative biaryl synthesis from organoborate under O2
Source: Royal Society of Chemistry journal article supplement (doi:10.1039/b610731a), 2006-01-01

### Supplementary Information

Hidenori Mizuno, Hidehiro Sakurai, Toru Amaya and Toshikazu Hirao\*

**General Methods:** Acetonitrile and dichloromethane were distilled from P<sub>2</sub>O<sub>5</sub>, then CaH<sub>2</sub>, and dried over Molecular Sieves 4A. VO(OEt)Cl<sub>2</sub> was prepared according to the literature procedures.<sup>i</sup> Other chemicals were of commercial quality. <sup>1</sup>H and <sup>13</sup>C NMR chemical shifts were reported in parts per million relative to residual non-deuterated solvent as an internal standard. <sup>11</sup>B NMR chemical shifts were reported in parts per million relative to BF<sub>3</sub>·OEt<sub>2</sub> in CDCl<sub>3</sub> as an external standard.

**Preparation of Sodium Tetraarylborate 1.** The borate **1** was prepared according to the reported method.<sup>ii</sup>

**Sodium tetraphenylborate (1a)** [143-66-8]

**Sodium tetrakis(4-chlorophenyl)borate (1b)** [14644-80-5]

**Sodium tetrakis(4-methylphenyl)borate (1c)** [15738-23-5]

**Sodium tetrakis(3-methylphenyl)borate (1d)** [123026-51-7]

**Sodium tetrakis(2-methylphenyl)borate (1e)** <sup>1</sup>H NMR (300 MHz, acetone-*d*<sub>6</sub>) δ 7.45 (d, 4H, *J* = 6.3 Hz), 6.92-6.86 (m, 12H), 2.37 (s, 12H). <sup>13</sup>C NMR (75 MHz, acetone-*d*<sub>6</sub>) 142.1, 133.0, 132.9, 129.3, 126.4, 124.4, 22.3 ppm. <sup>11</sup>B NMR (127 MHz, acetone-*d*<sub>6</sub>)

-6.73 ppm. IR (KBr) 3634, 3055, 3003, 1616, 1437, 1213, 931, 756  $\text{cm}^{-1}$ . HRMS (FAB-TOF:  $[\text{M}-\text{Na}]^-$ ) calcd. for  $\text{C}_{28}\text{H}_{28}\text{B}^-$  375.2284, found 375.2288.

**Sodium tetrakis(4-methoxyphenyl)borate (1f)** [26546-24-7]

**Biphenyl (2a)** [92-52-4]:  $^1\text{H}$  NMR (300 MHz,  $\text{CDCl}_3$ )  $\delta$  7.58 (d, 2H,  $J = 8.1$  Hz), 7.43 (t, 4H,  $J = 7.8$  Hz), 7.34 (d, 2H,  $J = 7.5$  Hz).  $^{13}\text{C}$  NMR (75 MHz,  $\text{CDCl}_3$ ) 140.8, 128.7, 127.2, 127.1 ppm. IR (KBr) 3086, 3057, 3033, 1942, 1875  $\text{cm}^{-1}$ .

**4,4'-Dichlorobiphenyl (2b)** [2050-68-2]:  $^1\text{H}$  NMR (300 MHz,  $\text{CDCl}_3$ )  $\delta$  7.46 (d, 2H,  $J = 8.4$  Hz), 7.39 (d, 2H,  $J = 8.4$  Hz).  $^{13}\text{C}$  NMR (75 MHz,  $\text{CDCl}_3$ ) 138.4, 133.7, 129.0, 128.2 ppm. IR (KBr) 2924, 2853, 1903, 1503, 1472, 1089, 815  $\text{cm}^{-1}$ .

**4,4'-Dimethylbiphenyl (2c)** [613-33-2]:  $^1\text{H}$  NMR (300 MHz,  $\text{CDCl}_3$ )  $\delta$  7.46 (d, 2H,  $J = 8.1$  Hz), 7.22 (d, 2H,  $J = 8.7$  Hz), 2.37 (s, 6H).  $^{13}\text{C}$  NMR (75 MHz,  $\text{CDCl}_3$ ) 138.3, 136.7, 129.4, 126.8, 21.1 ppm. IR (KBr) 3022, 2915, 2851, 1902, 1501, 802  $\text{cm}^{-1}$ .

**3,3'-Dimethylbiphenyl (2d)** [612-75-9]:  $^1\text{H}$  NMR (300 MHz,  $\text{CDCl}_3$ )  $\delta$  7.38 (d, 4H,  $J = 7.8$  Hz), 7.31 (t, 2H,  $J = 7.5$  Hz), 7.14 (d, 2H,  $J = 7.8$  Hz), 2.41 (s, 6H).  $^{13}\text{C}$  NMR (75 MHz,  $\text{CDCl}_3$ ) 141.3, 138.2, 128.6, 128.0, 127.9, 124.3, 21.5 ppm. IR (liquid film) 3027, 2919, 1604, 1474, 1091, 878, 772, 697  $\text{cm}^{-1}$ .

**2,2'-Dimethylbiphenyl (2e)** [605-39-0]:  $^1\text{H}$  NMR (300 MHz,  $\text{CDCl}_3$ )  $\delta$  7.25-7.18 (m, 6H), 7.08 (d, 2H,  $J = 6.0$  Hz).  $^{13}\text{C}$  NMR (75 MHz,  $\text{CDCl}_3$ ) 141.6, 135.8, 129.8, 129.3,

127.1, 125.5, 19.8 ppm. IR (liquid film) 3059, 3016, 2921, 1914, 1600, 1452, 757, 730  $\text{cm}^{-1}$ .

**4,4'-Dimethoxybiphenyl (2f)** [2132-80-1]:  $^1\text{H}$  NMR (300 MHz,  $\text{CDCl}_3$ )  $\delta$ , 7.46 (d, 2H,  $J = 8.7$  Hz), 6.94 (d, 4H,  $J = 9.0$  Hz), 3.83 (s, 6H).  $^{13}\text{C}$  NMR (75 MHz,  $\text{CDCl}_3$ ) 158.7, 133.5, 127.7, 114.1, 55.4 ppm. IR (KBr) 2957, 2839, 1606, 1500, 1276, 1250, 1041, 824  $\text{cm}^{-1}$ .

**4-Chlorobiphenyl (6b)** [2051-62-9]:  $^1\text{H}$  NMR (300 MHz,  $\text{CDCl}_3$ )  $\delta$  7.32-7.55 (m, 9H).  $^{13}\text{C}$  NMR (75 MHz,  $\text{CDCl}_3$ ) 140.0, 139.7, 133.4, 128.9, 128.4, 127.5, 127.0 ppm. IR (KBr) 3058, 3032, 1904, 1478, 1098, 757  $\text{cm}^{-1}$ .

**4-Methylbiphenyl (6c)** [644-08-6]:  $^1\text{H}$  NMR (300 MHz,  $\text{CDCl}_3$ )  $\delta$  7.58 (d, 2H,  $J = 6.9$  Hz), 7.49 (d, 2H,  $J = 8.1$  Hz), 7.42 (t, 2H,  $J = 7.2$  Hz) 7.32 (m, 1H), 7.25 (d, 2H,  $J = 7.5$  Hz), 2.39 (s, 3H).  $^{13}\text{C}$  NMR (75 MHz,  $\text{CDCl}_3$ ) 141.1, 138.3, 137.0, 129.5, 128.7, 127.0, 126.9, 21.1 ppm. IR (KBr) 3031, 2915, 1908, 1487, 1444, 1402, 1128, 1006, 822, 754  $\text{cm}^{-1}$ .

**3-Methylbiphenyl (6d)** [643-93-6]:  $^1\text{H}$  NMR (300 MHz,  $\text{CDCl}_3$ )  $\delta$  7.60-7.56 (m, 2H), 7.45-7.30 (m, 6H), 7.18-7.14 (m, 1H) 2.41 (s, 3H).  $^{13}\text{C}$  NMR (75 MHz,  $\text{CDCl}_3$ ) 141.6, 141.5, 138.6, 128.9, 128.2, 127.4, 124.5, 21.8 ppm. IR (liquid film) 3031, 2919, 1944, 1600, 1481, 1455  $\text{cm}^{-1}$ .

**2-Methylbiphenyl (6e)** [643-58-3]:  $^1\text{H}$  NMR (300 MHz,  $\text{CDCl}_3$ )  $\delta$  7.21-7.40 (m, 9H), 2.26 (s, 3H).  $^{13}\text{C}$  NMR (75 MHz,  $\text{CDCl}_3$ ) 141.9, 135.3, 130.3, 129.8, 129.2, 128.0, 127.2, 126.7, 125.7, 20.5 ppm. IR (liquid film) 3059, 1950, 1807, 1599, 1479, 1439, 1010  $\text{cm}^{-1}$ .

**4-Methoxybiphenyl (6f)** [613-37-6]:  $^1\text{H}$  NMR (300 MHz,  $\text{CDCl}_3$ )  $\delta$  7.53 (m, 4H), 7.40 (t, 2H,  $J = 7.2$  Hz), 7.28 (t, 1H,  $J = 7.5$  Hz), 6.96 (d, 2H,  $J = 8.7$  Hz), 3.84 (s, 3H).  $^{13}\text{C}$  NMR (75 MHz,  $\text{CDCl}_3$ ) 128.7, 128.1, 126.7, 126.6, 114.2, 55.3 ppm. IR (KBr) 3066, 3002, 2836, 1890, 1606, 1521, 1482, 1286  $\text{cm}^{-1}$ .

**4-*N,N*-Dimethylaminobiphenyl (6g)** [1137-79-7]:  $^1\text{H}$  NMR (300 MHz,  $\text{CDCl}_3$ )  $\delta$  7.56-7.48 (m, 4H), 7.38 (t, 2H,  $J = 7.5$  Hz), 7.24 (t, 1H,  $J = 9.0$  Hz) 6.80 (d, 2H,  $J = 9.0$  Hz), 2.98 (s, 3H).  $^{13}\text{C}$  NMR (75 MHz,  $\text{CDCl}_3$ ) 150.0, 141.2, 128.6, 127.7, 126.3, 126.0, 112.7, 40.6 ppm. IR (KBr) 3030, 2879, 2800, 1880, 1610, 1491, 1354, 1230, 1062, 819, 758  $\text{cm}^{-1}$ .

**1-Phenylnaphtalene (6h)** [605-02-7]:  $^1\text{H}$  NMR (300 MHz,  $\text{CDCl}_3$ )  $\delta$  7.92-7.84 (m, 3H), 7.55-7.41 (m, 9H).  $^{13}\text{C}$  NMR (75 MHz,  $\text{CDCl}_3$ ) 140.7, 140.2, 133.8, 131.6, 130.0, 128.2, 127.6, 127.2, 126.9, 126.0, 125.7, 125.4 ppm. IR (liquid film) 3055, 1814, 1591, 1493, 1395, 961, 802, 702  $\text{cm}^{-1}$ .

**2-Phenylthiophene (6i)** [825-55-8]:  $^1\text{H}$  NMR (300 MHz,  $\text{CDCl}_3$ )  $\delta$  7.60 (d, 2H,  $J = 7.2$  Hz), 7.36 (t, 2H,  $J = 7.2$  Hz), 7.31-7.25 (m, 3H), 7.07 (dd, 1H).  $^{13}\text{C}$  NMR (75 MHz,  $\text{CDCl}_3$ ) 144.4, 134.4, 128.9, 128.0, 127.4, 125.9, 124.8, 123.0 ppm. IR (KBr) 3067, 2927, 1945, 1594, 1488, 1446, 1074, 850, 754, 689  $\text{cm}^{-1}$ .

**Preparation of Potassium Diphenyldifluoroborate (7a).** The synthesis of **7a** was based on the method reported by Ito et al<sup>10</sup> to give **7a** as a white powder in 63% yield.

**Potassium diphenyldifluoroborate (7a)** [18114-68-6]

**Procedure for the Oxidative Ligand Coupling of Potassium Diphenyldifluoroborate (7a).** Potassium diphenyldifluoroborate (**7a**, 48.4 mg, 0.20 mmol) and a stirring bar were placed in a 20 mL 2-necked round bottom flask, and dried. 2 mL of acetonitrile and 0.87 mL of dichloromethane were added into the flask, followed by the addition VO(OEt)Cl<sub>2</sub> (0.80 M solution in dichloromethane, 0.13 mL, 0.10 mmol) under an oxygen atmosphere. The reaction mixture was allowed to reflux smoothly and stirred for 10 h. Then, 1M aqueous HCl (3 mL) was added so as to quench the reaction. After extraction with Et<sub>2</sub>O (3 × 10 mL), the combined organic layer was washed with brine, dried over MgSO<sub>4</sub>, and evaporated. The purification of the crude product with preparative TLC (hexane) gave biphenyl (**2a**, 78% yield, Scheme 2).

## References

- (i) (a) Funk, H.; Weiss, W.; Zeising, M. *Anorg. Allg. Chem.* **1958**, *36*, 296. (b) Hirao, T.; Mori, M.; Ohshiro, Y. *Bull. Chem. Soc. Jpn.* **1989**, *62*, 2399.
- (ii) Ohashi, K.; Banno, T.; Umeno, M.; Honma, S.; Abe, F. Jpn. Kohkai Tokkyo Koho JP8169892.

<sup>1</sup>H NMR spectrum of **1a**

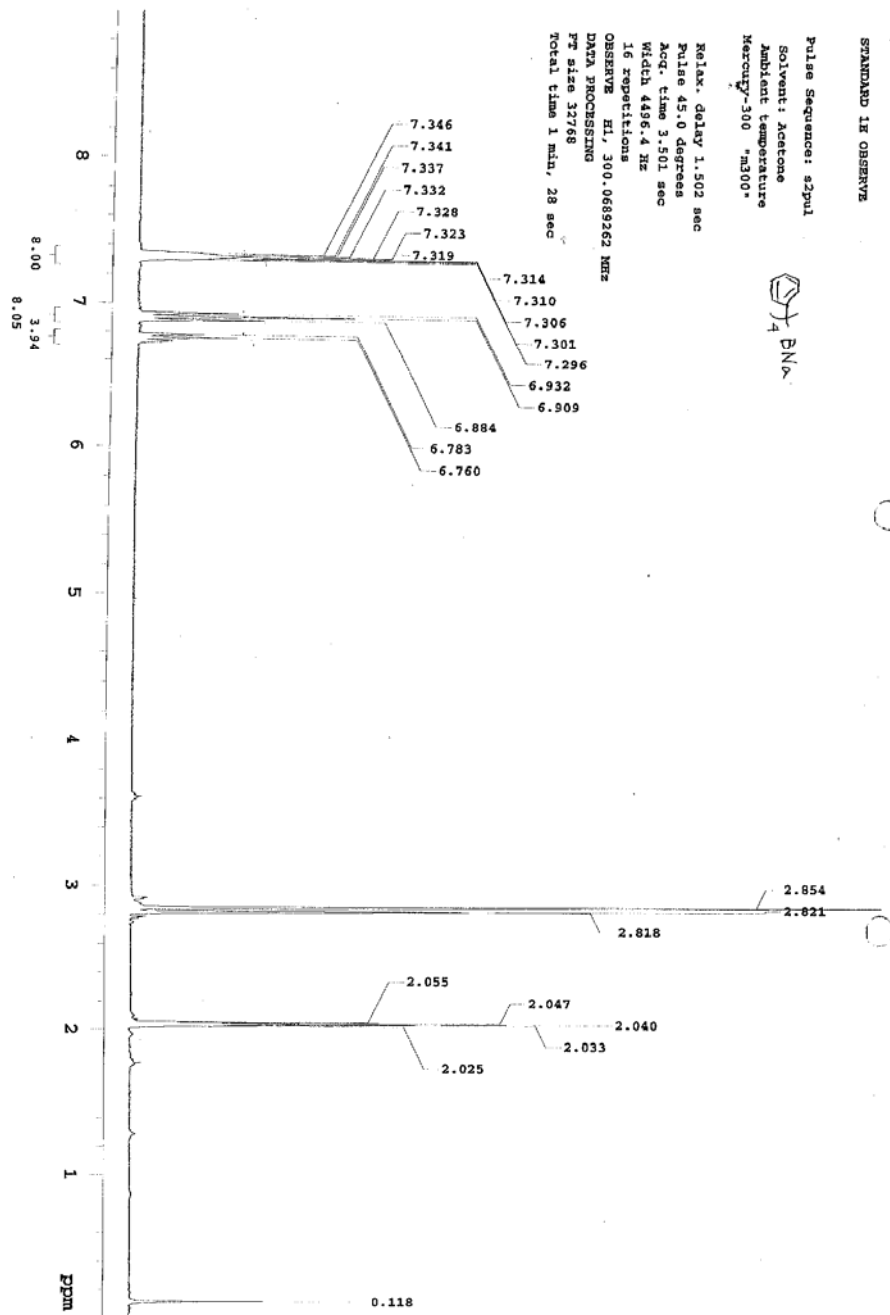

<sup>13</sup>C NMR spectrum of **1a**

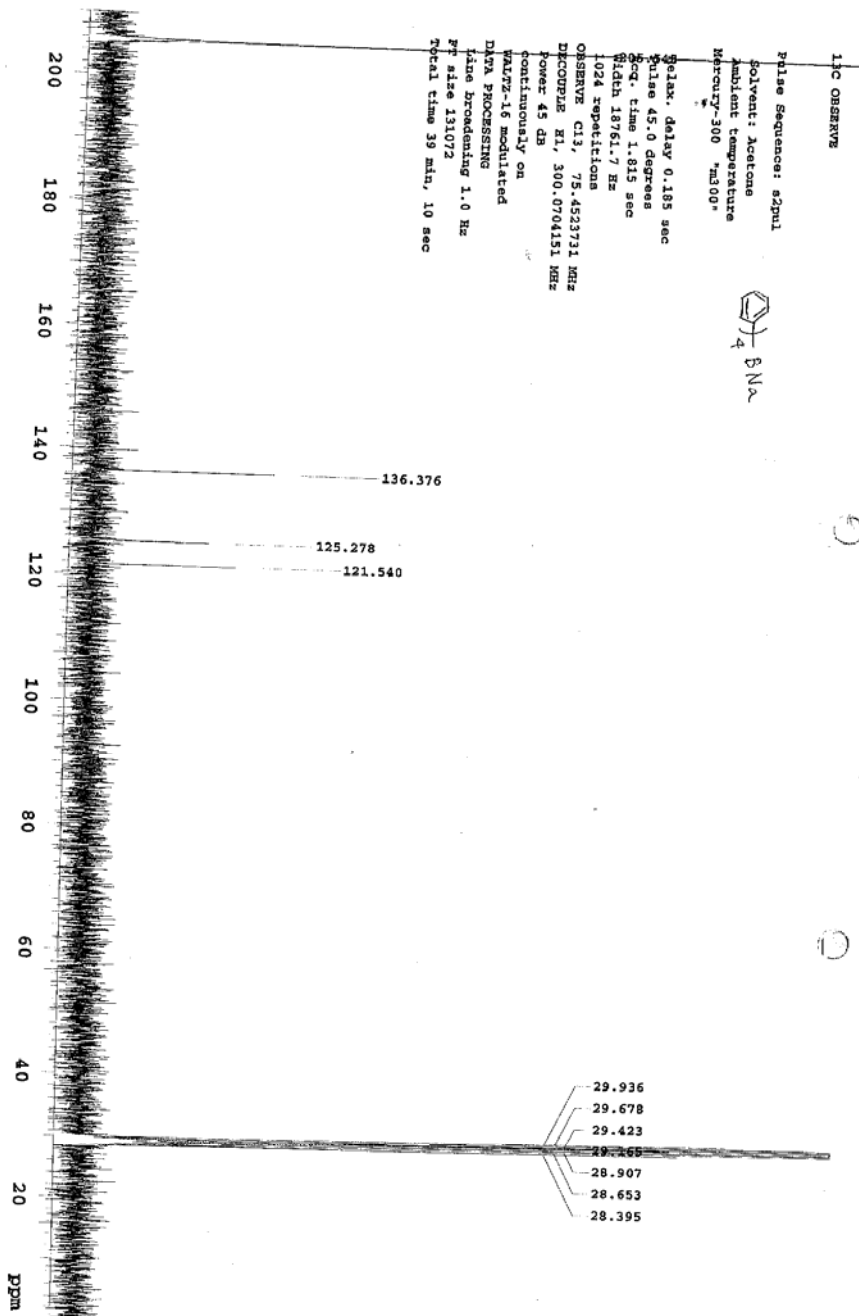





$^1\text{H}$  NMR spectrum of **1b**

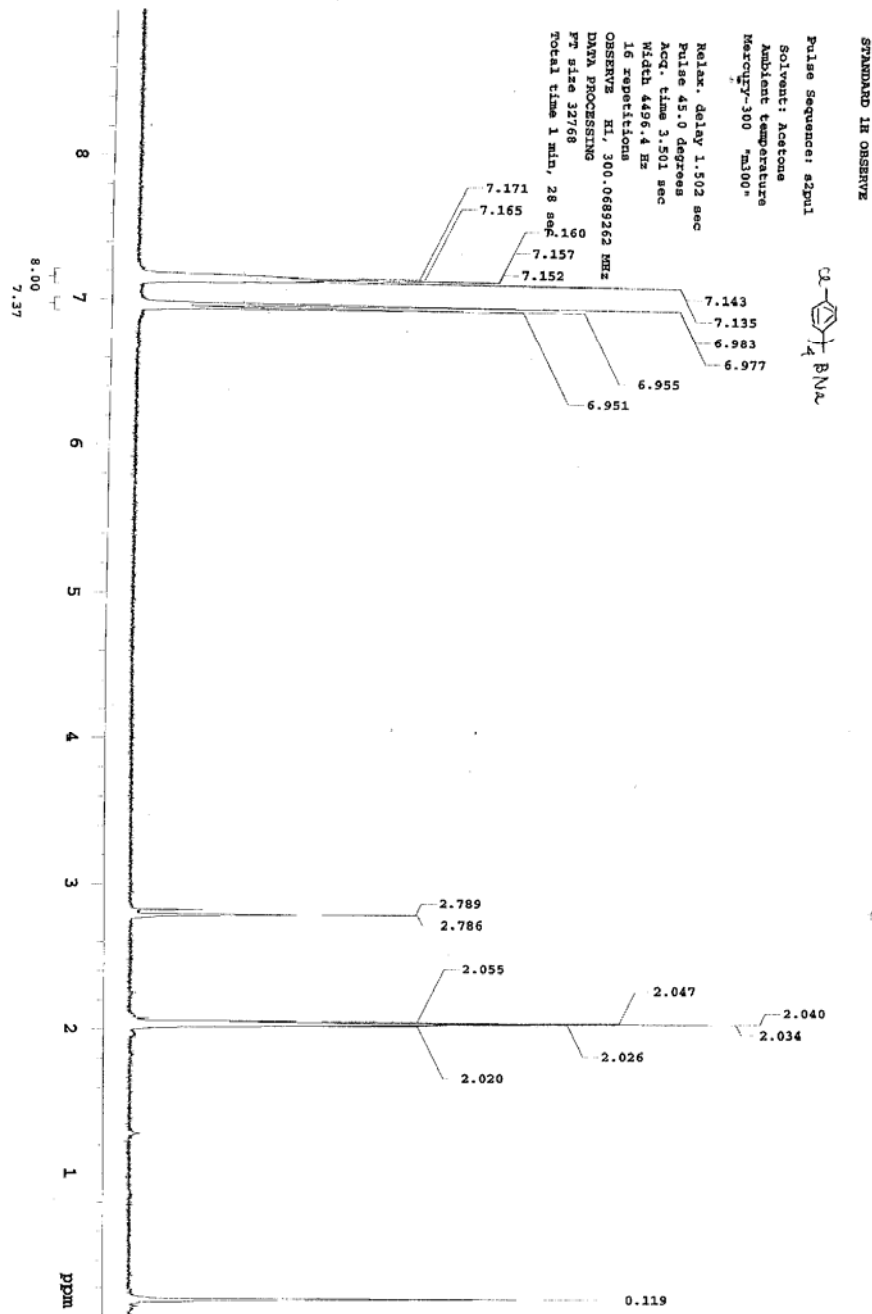

57

<sup>13</sup>C NMR spectrum of **1b**

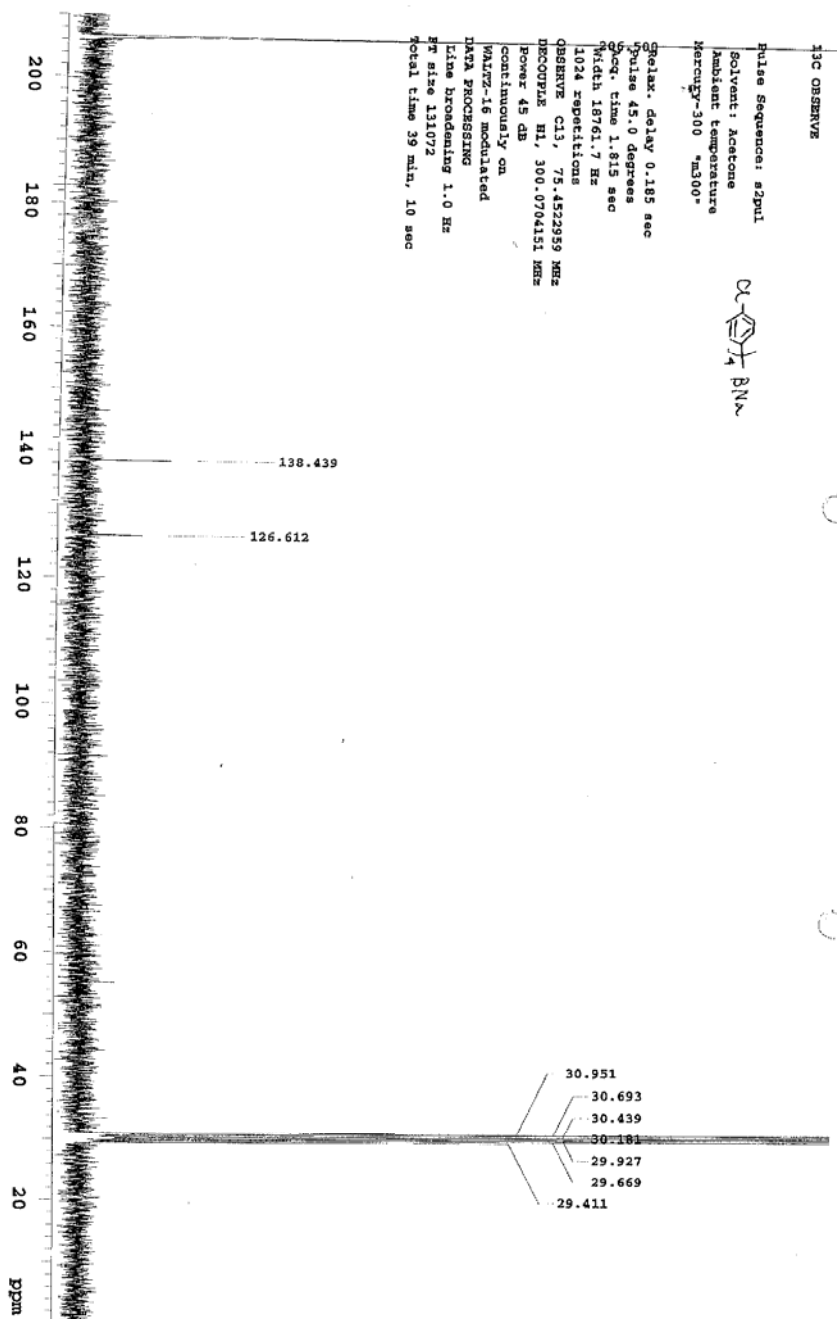





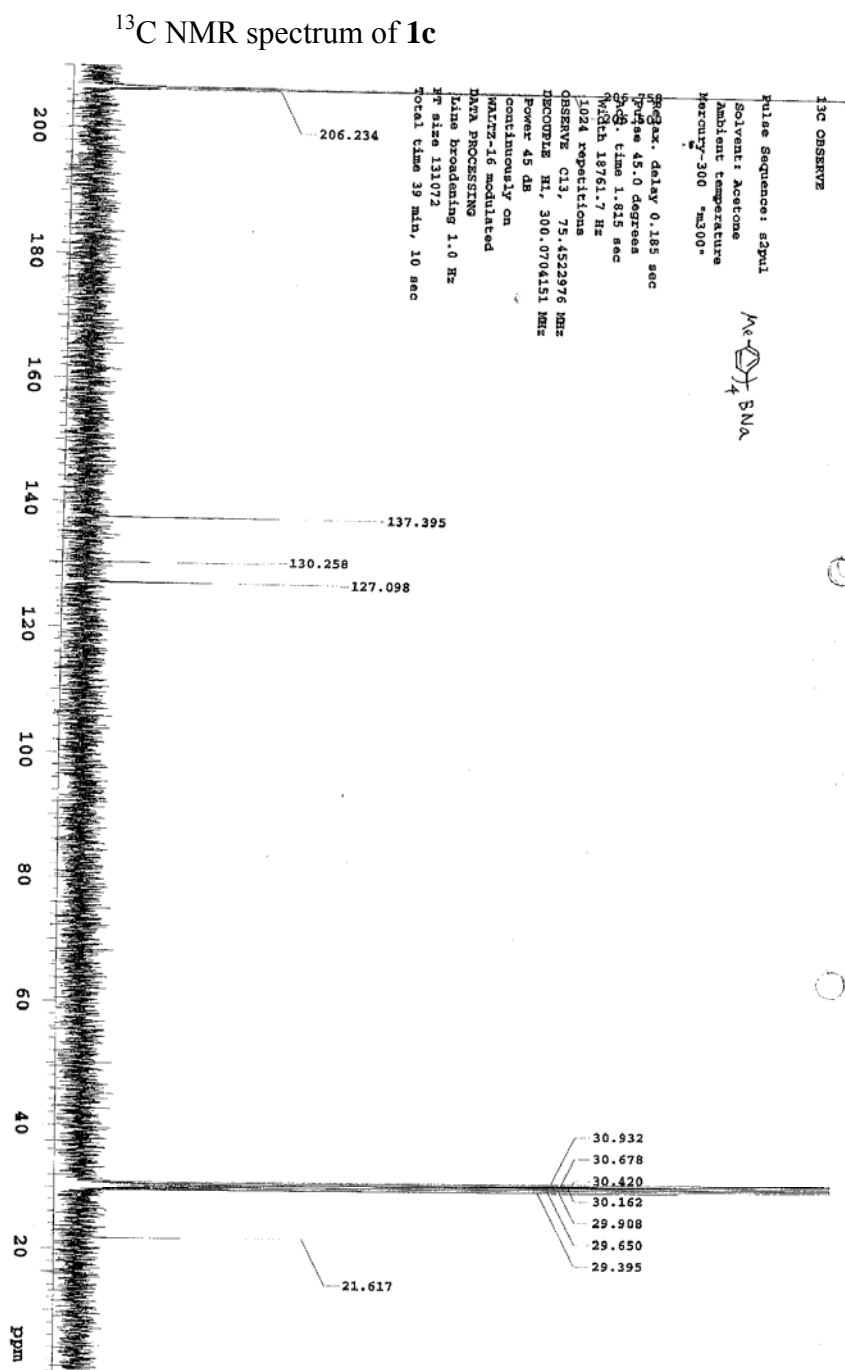

410

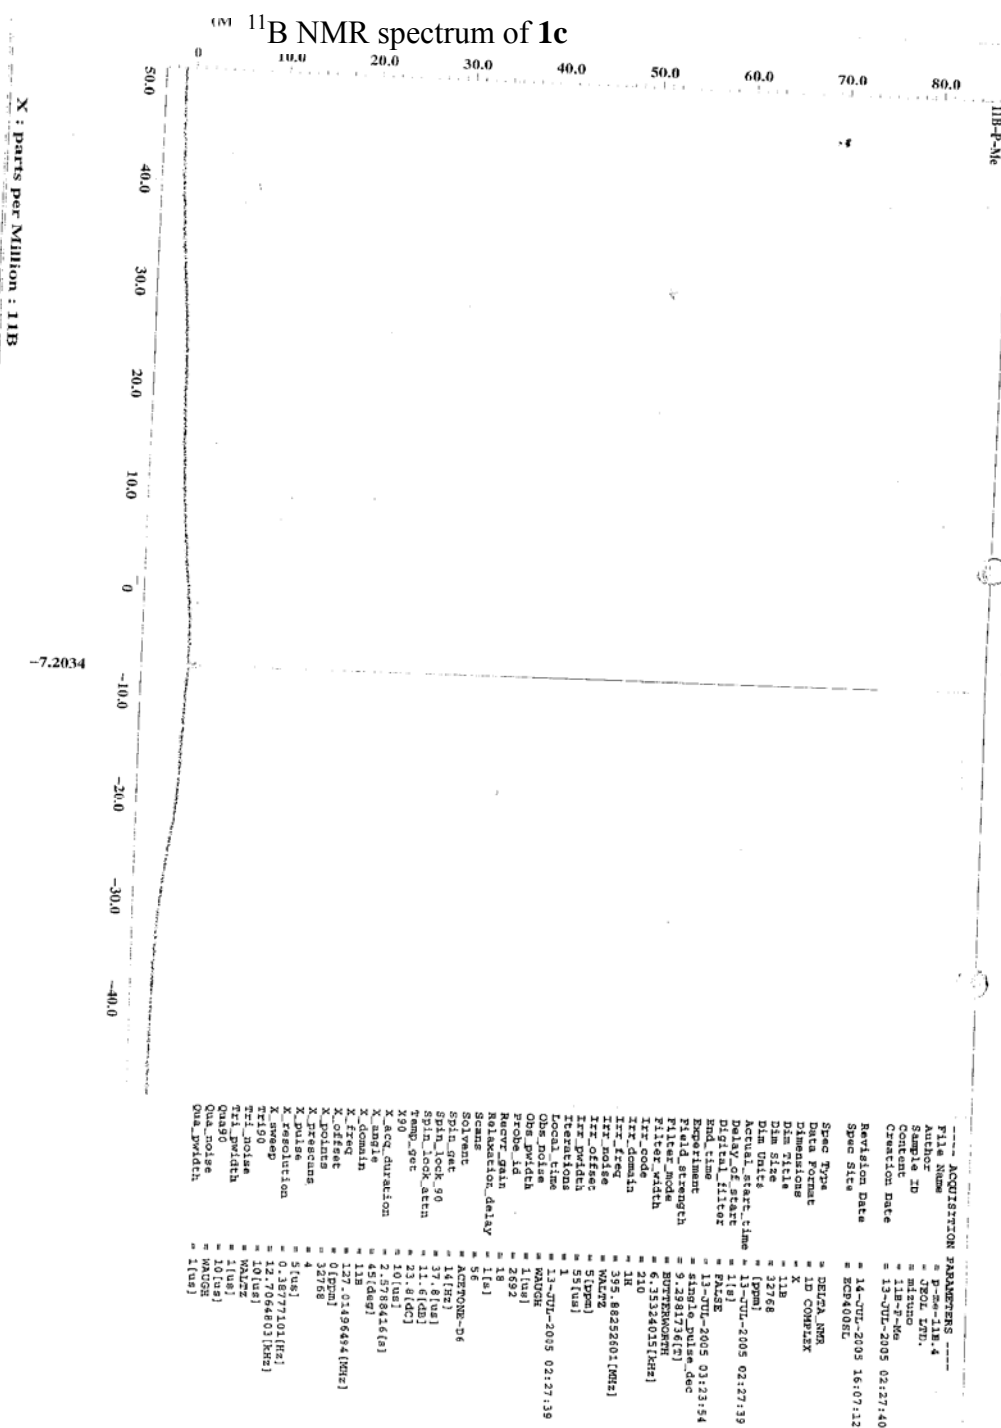

S 12

<sup>1</sup>H NMR spectrum of **1d**

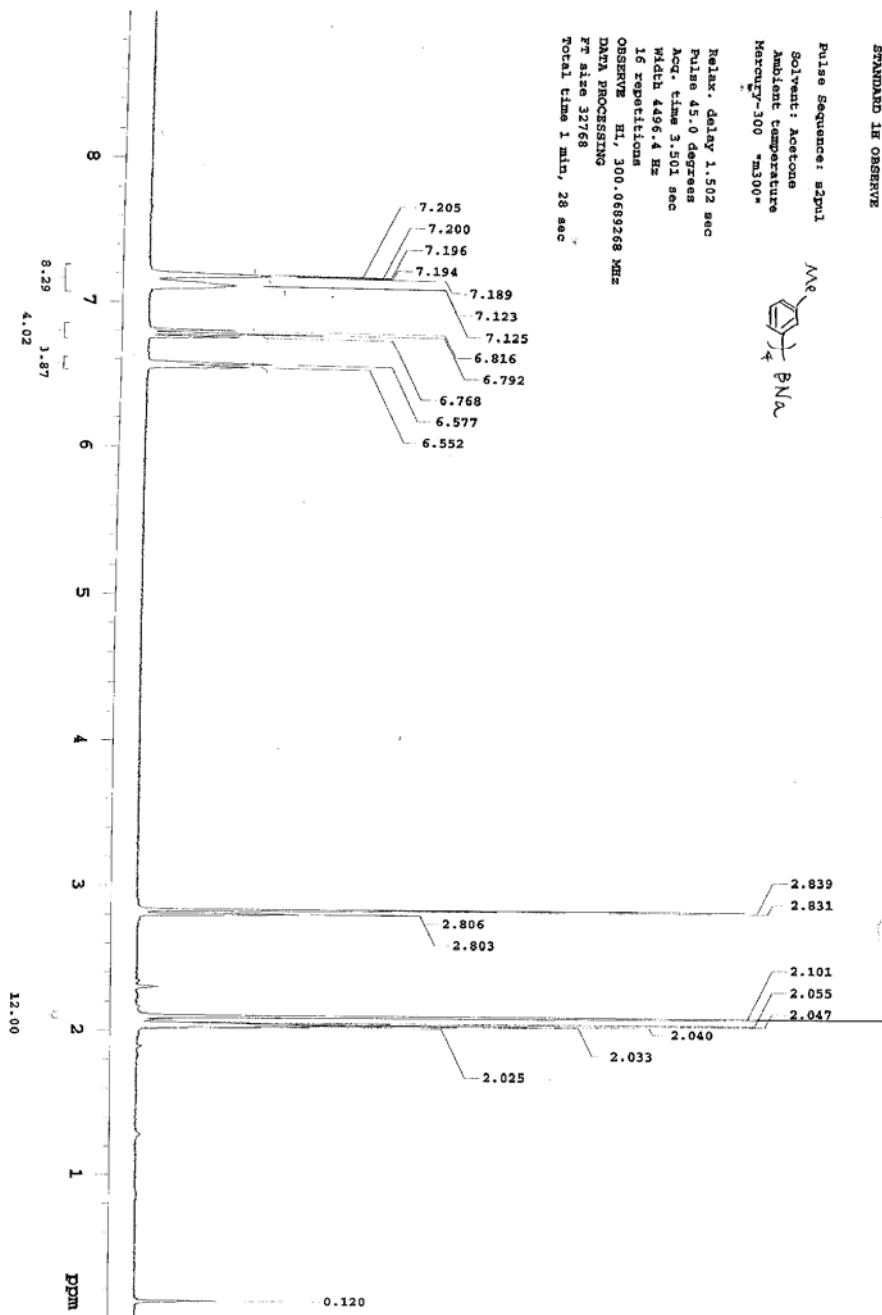

S13

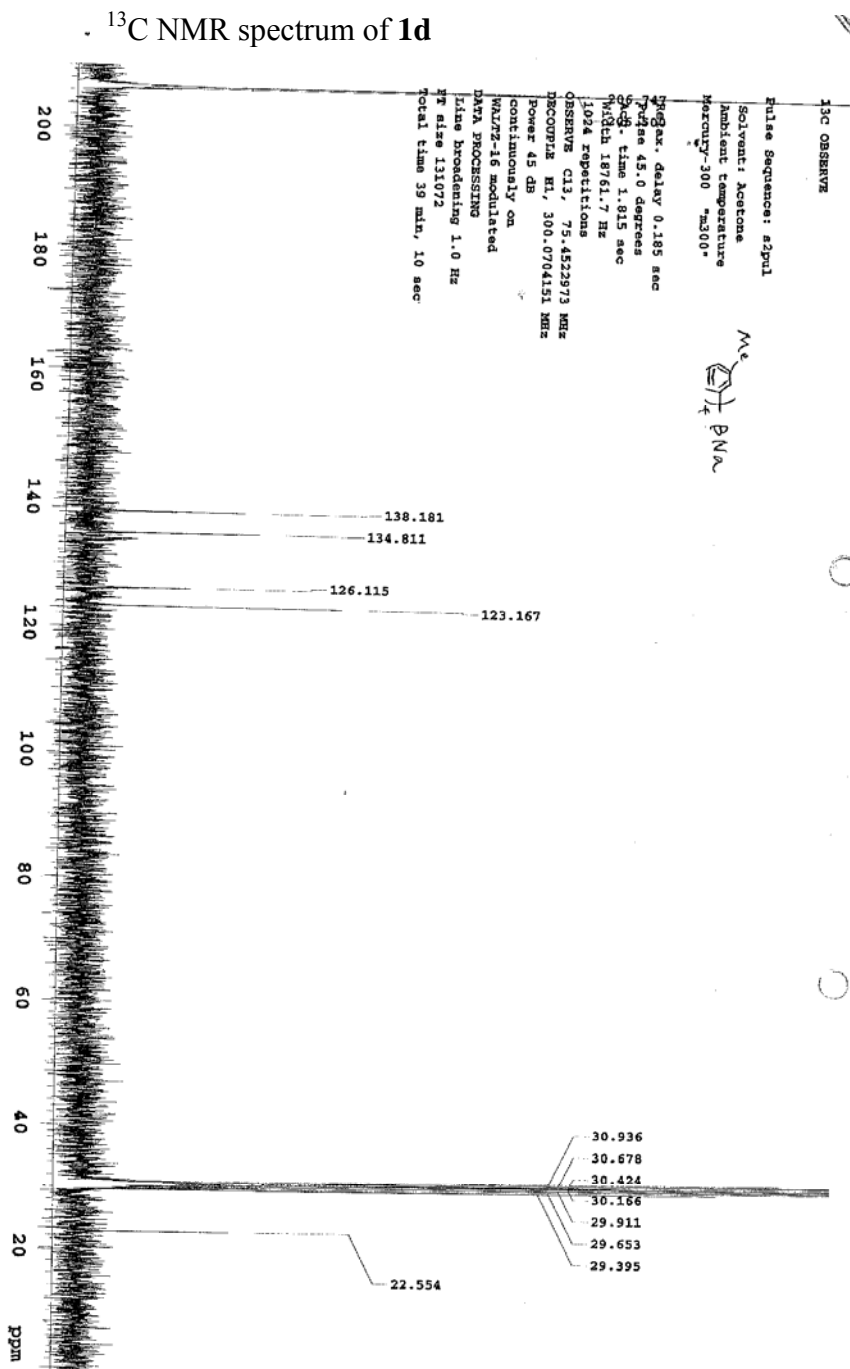

S14



<sup>11</sup>B NMR spectrum of **1d**

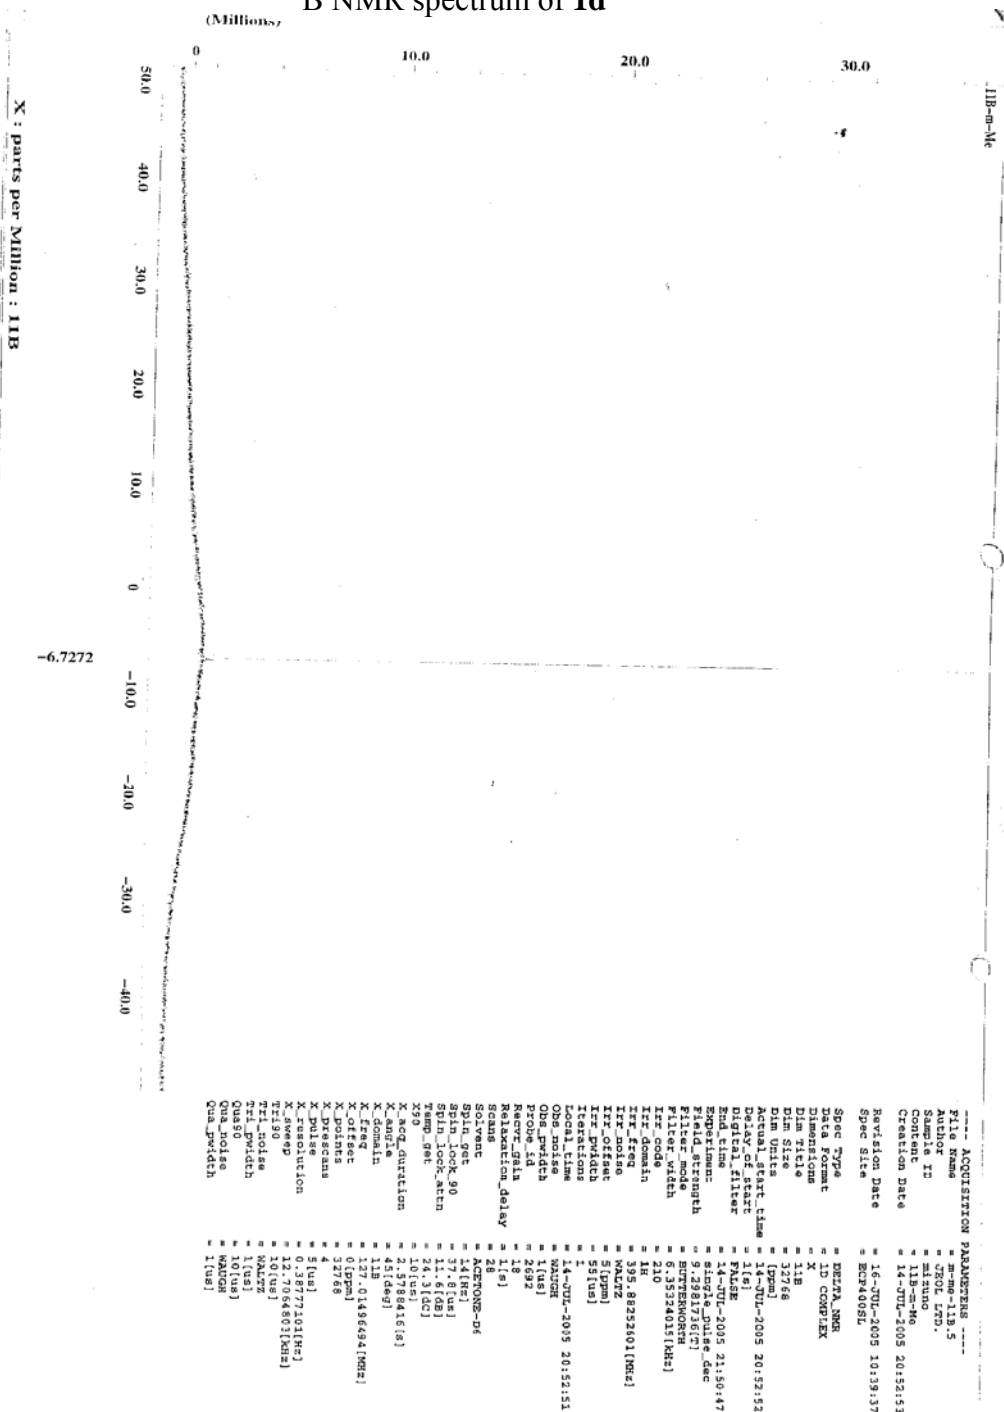

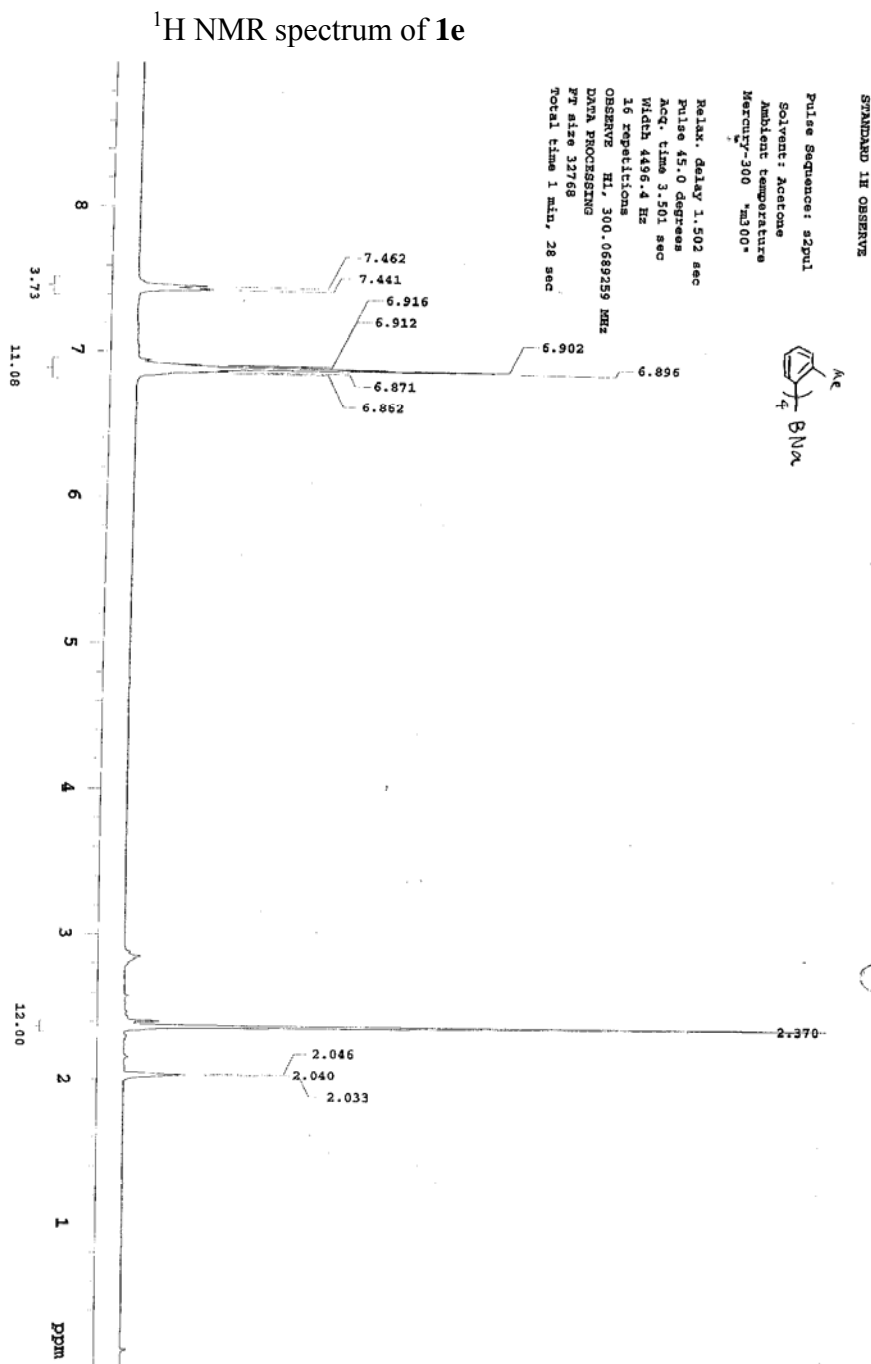

<sup>13</sup>C NMR spectrum of **1e**

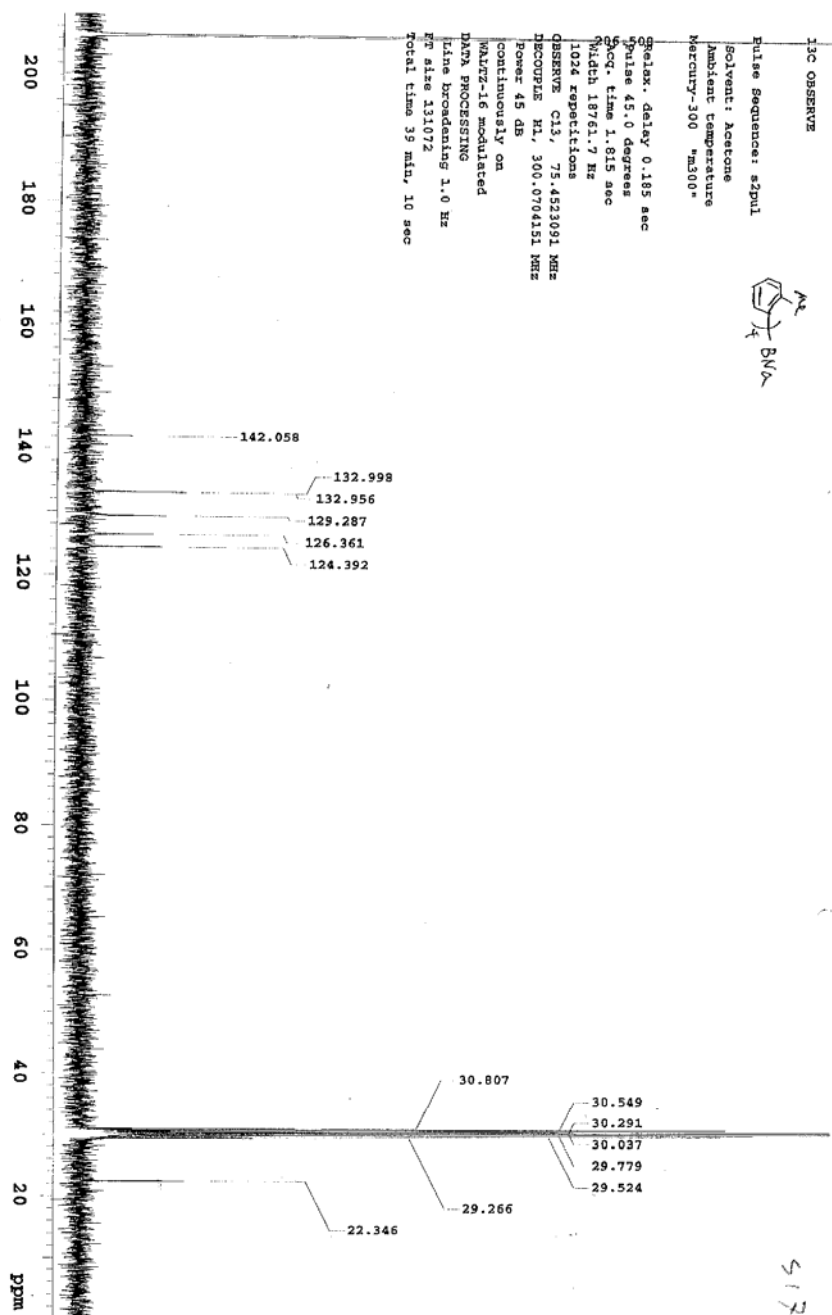

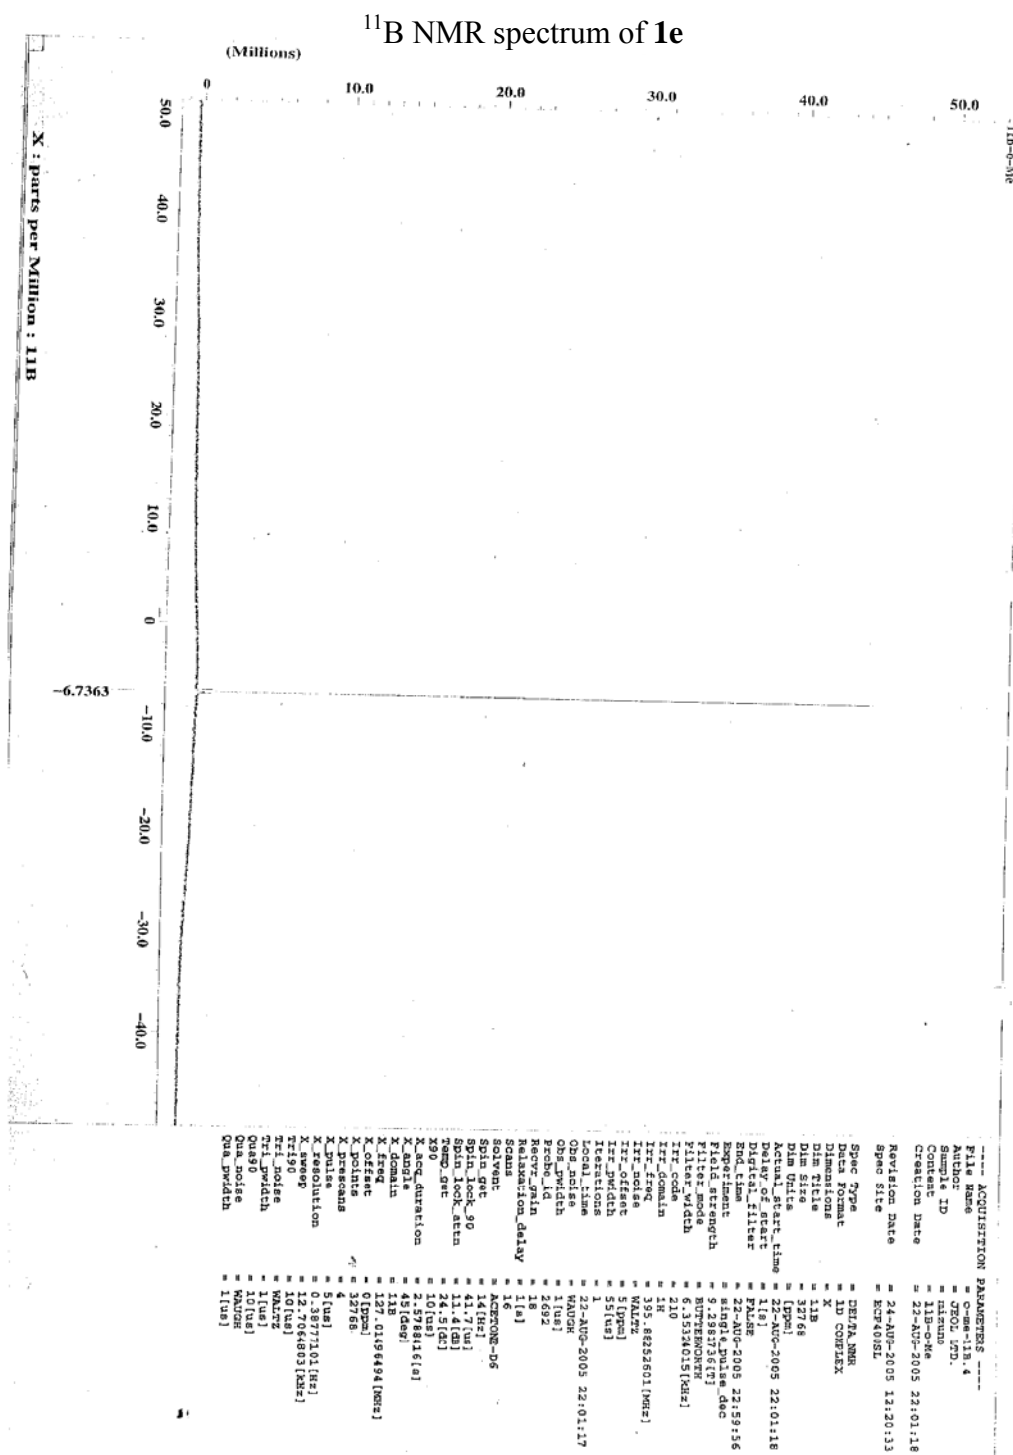

518

<sup>1</sup>H NMR spectrum of **1f**

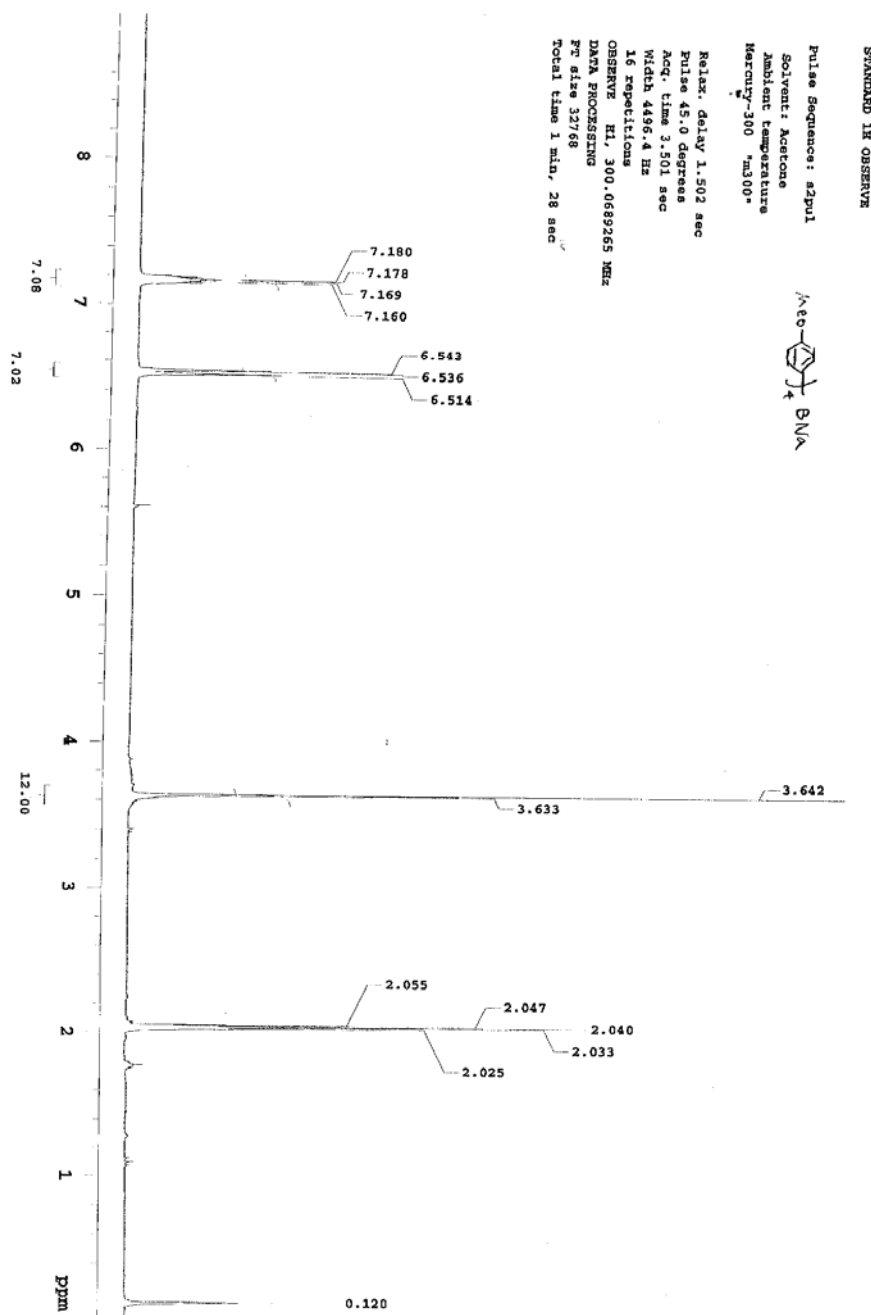

519

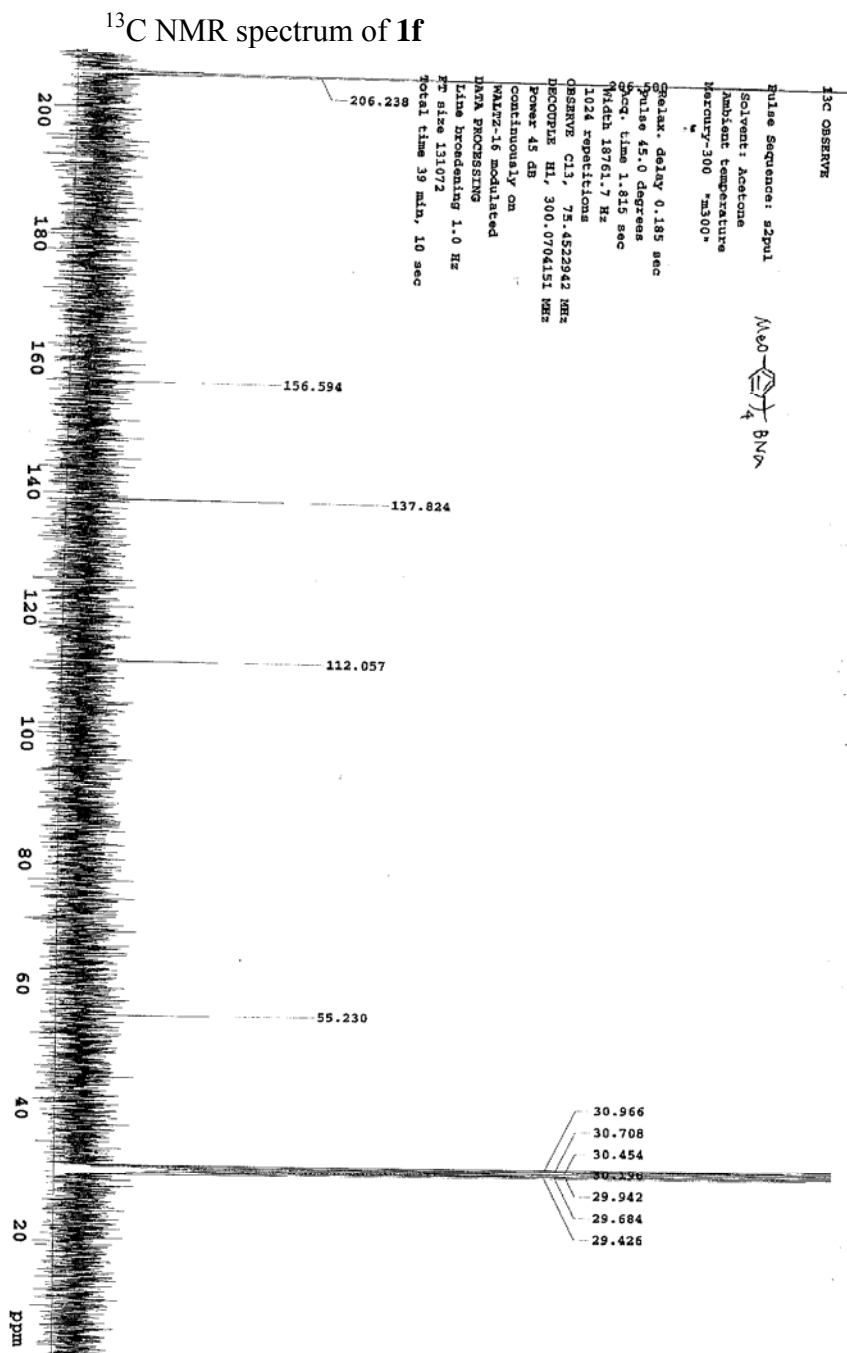

S 10



$^1\text{H}$  NMR spectrum of **2a**

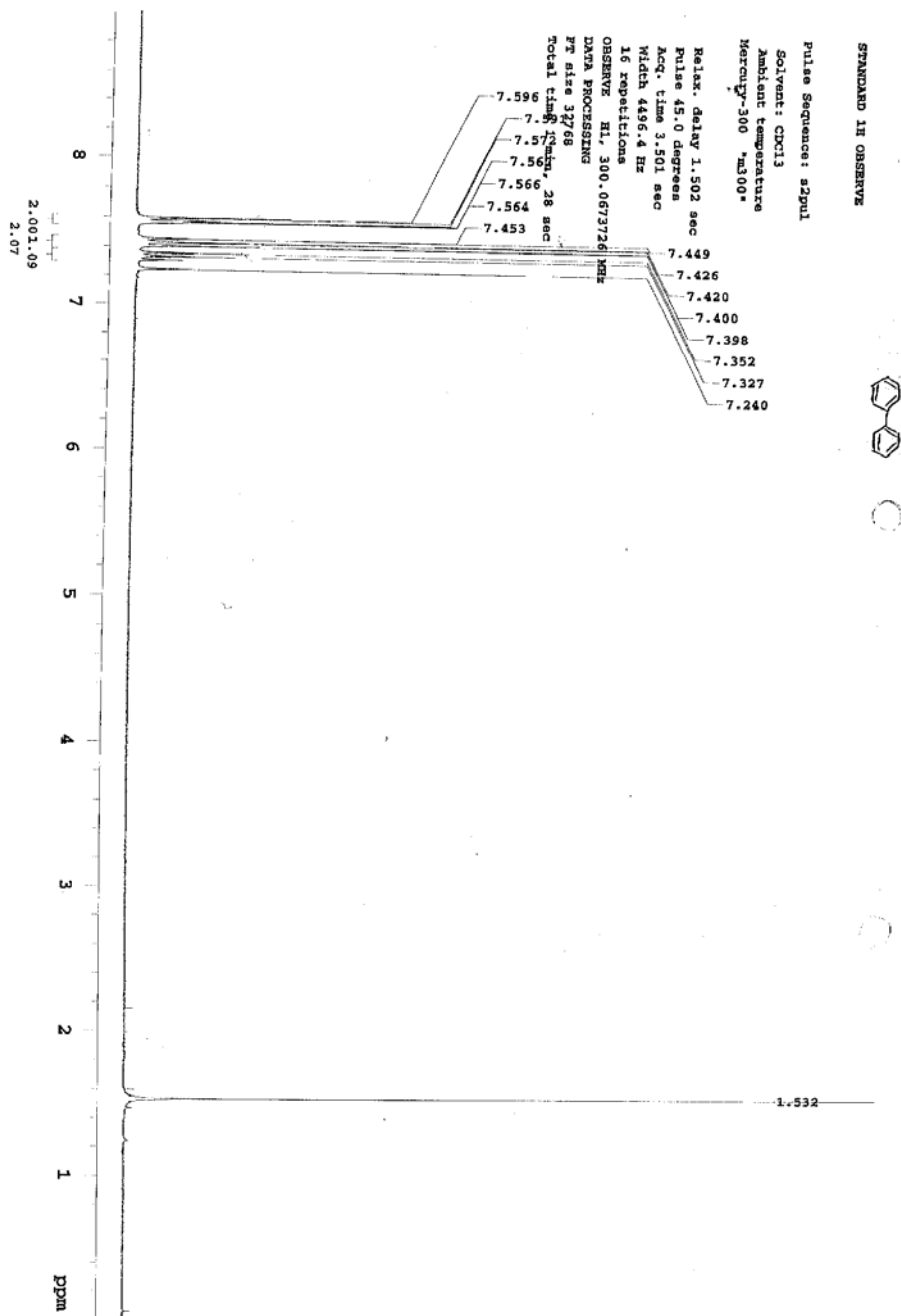



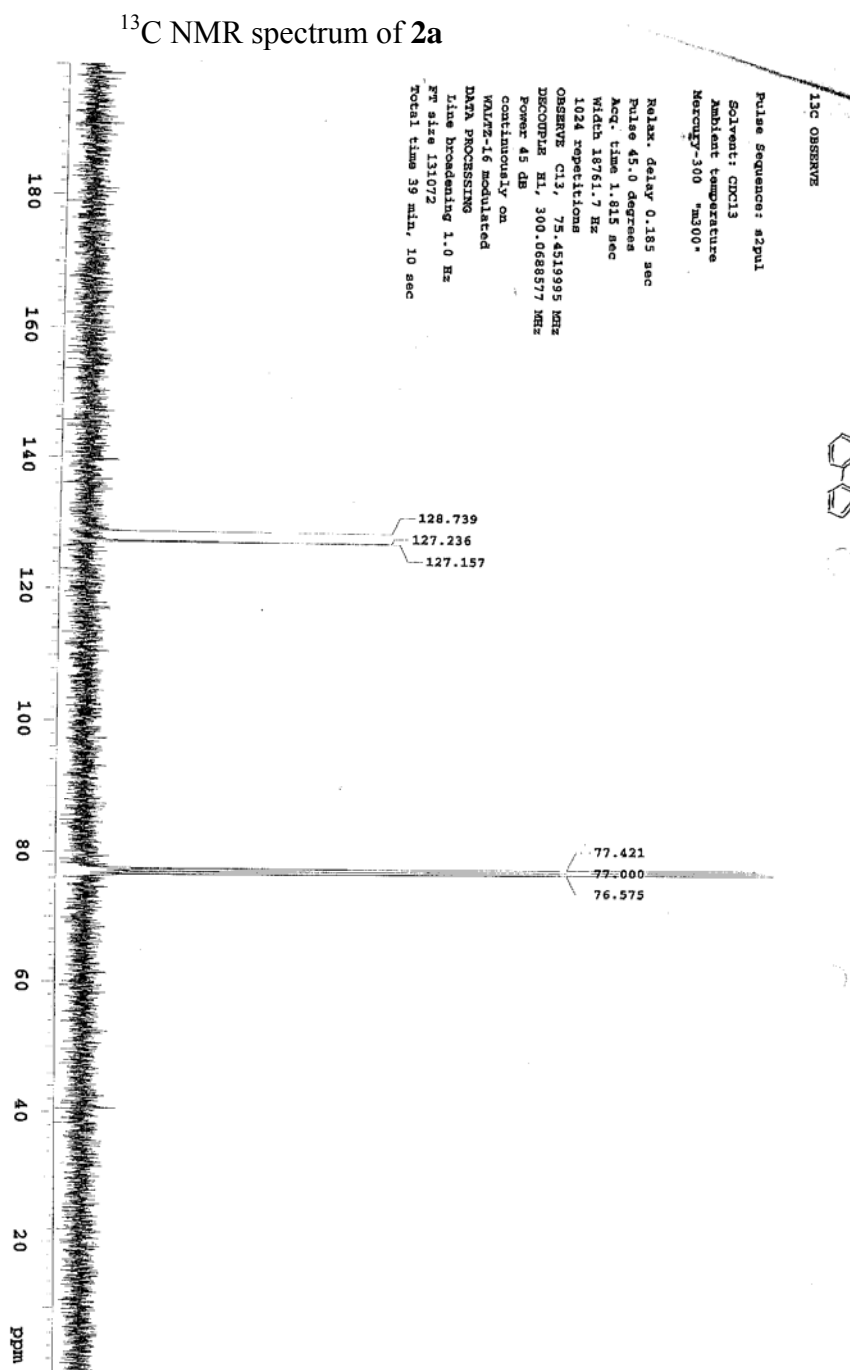

<sup>1</sup>H NMR spectrum of **2b**

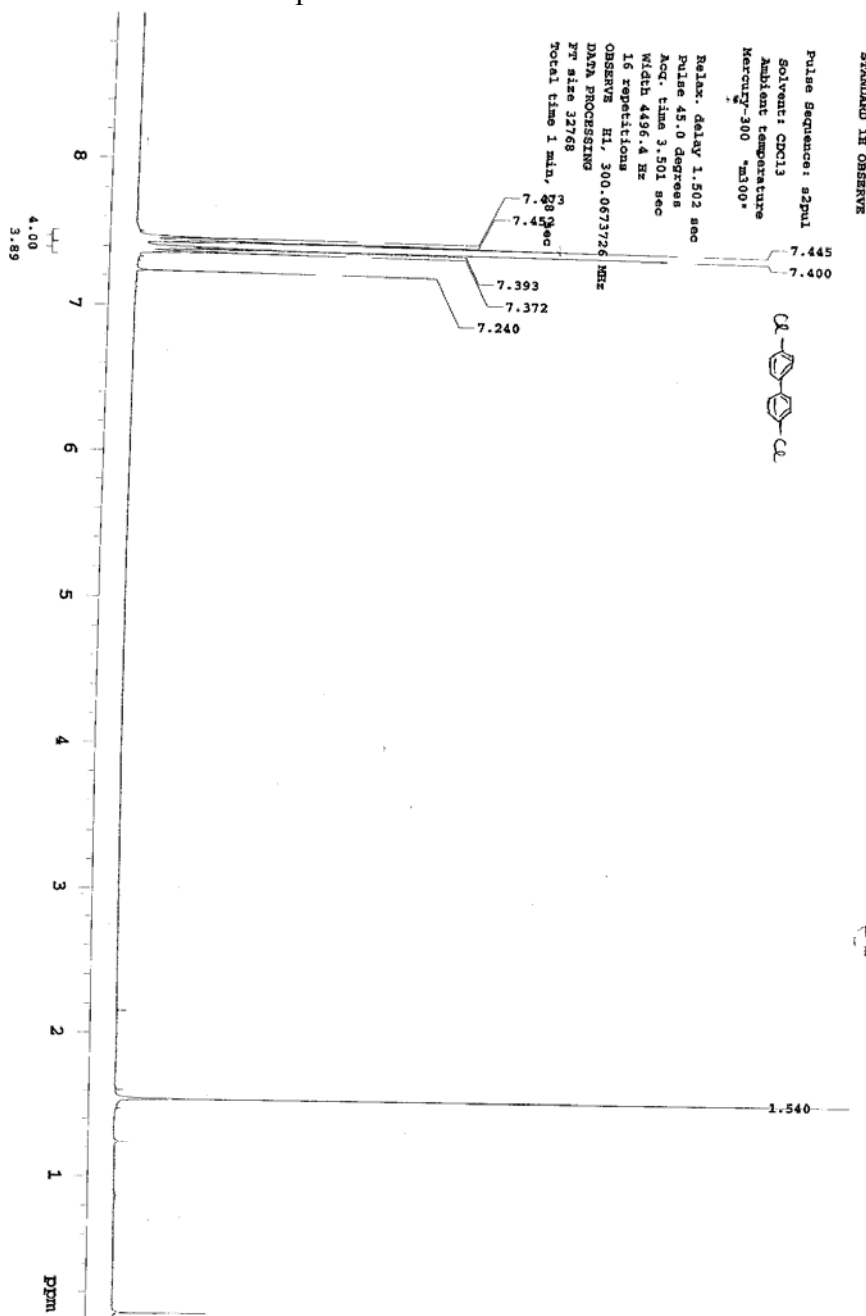

<sup>13</sup>C NMR spectrum of **2b**

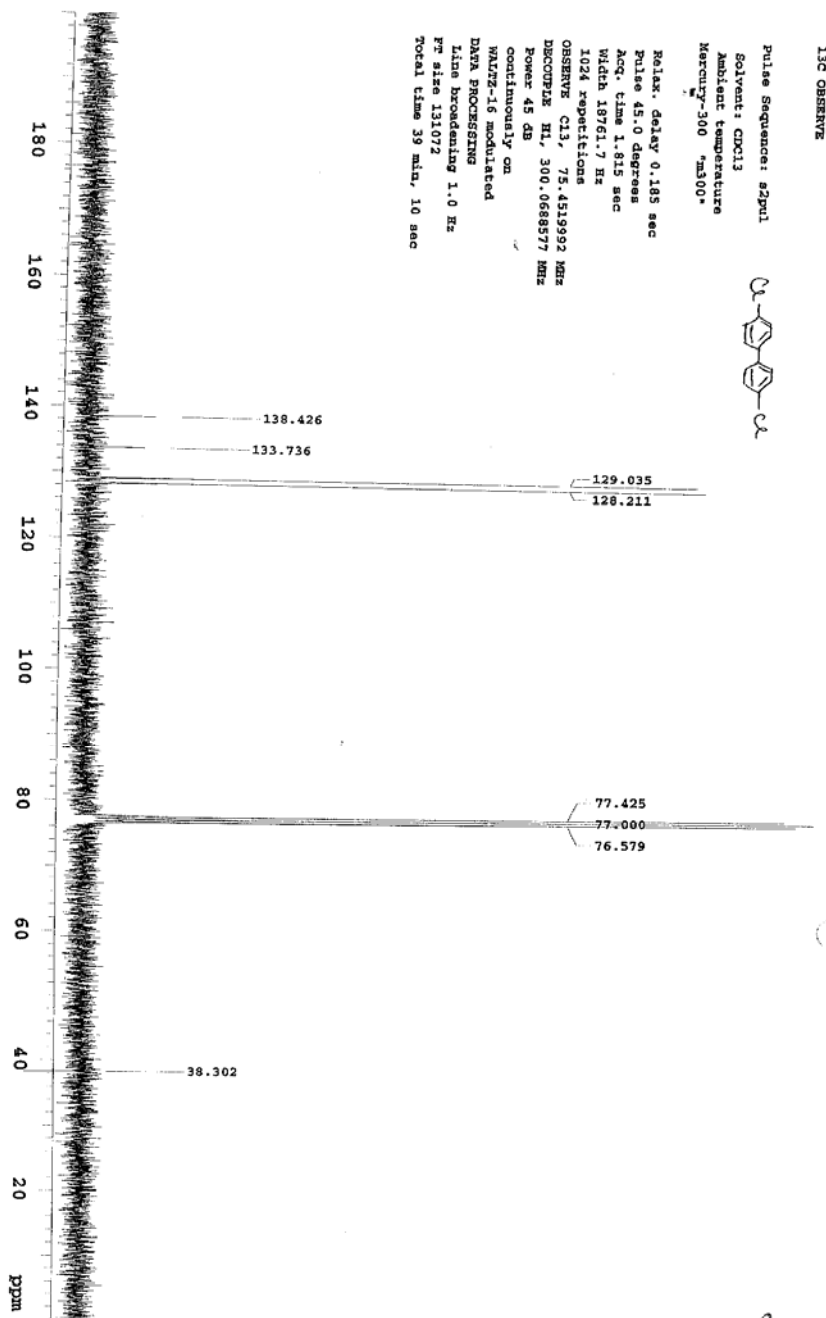

S 25

<sup>1</sup>H NMR spectrum of 2c

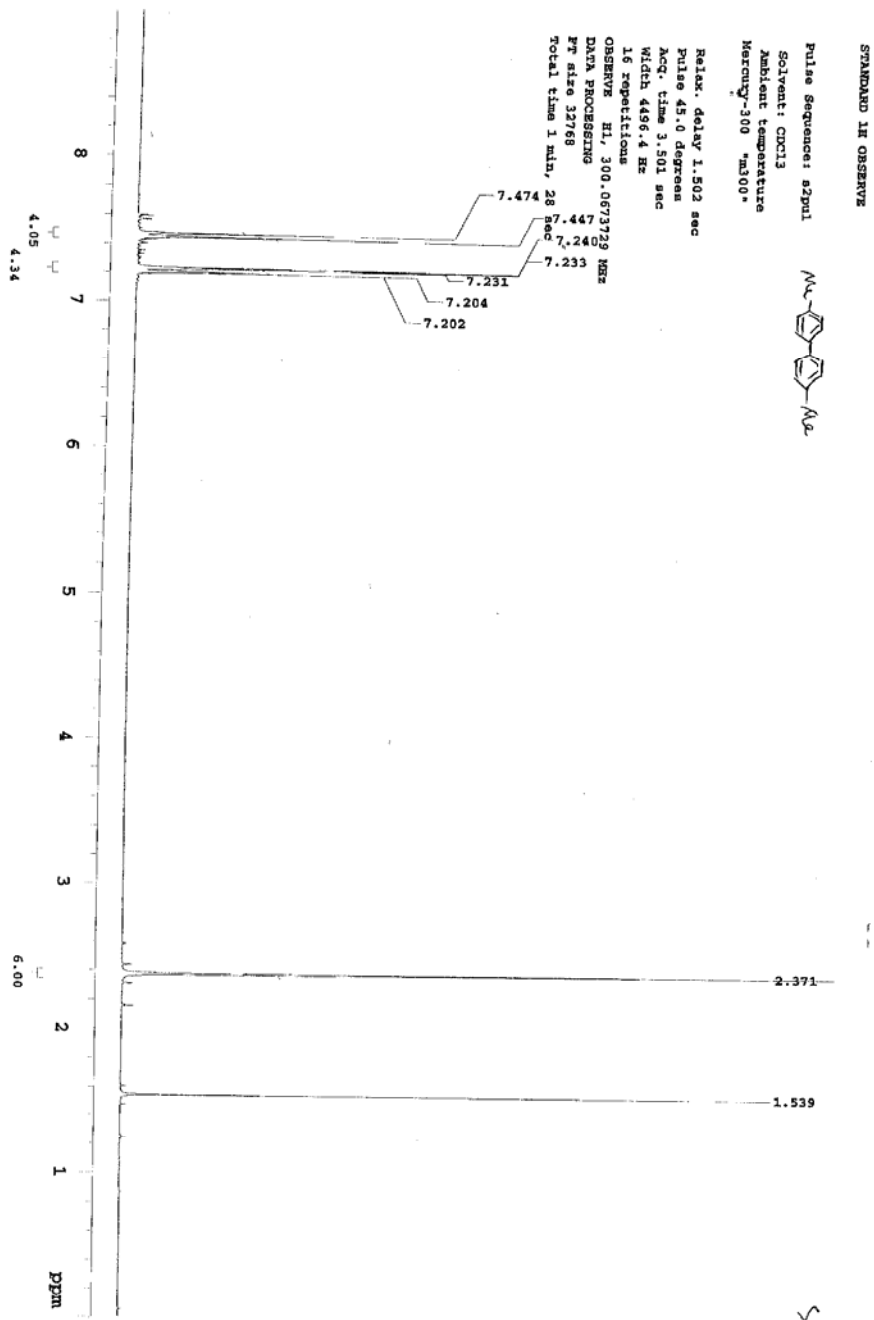

<sup>13</sup>C NMR spectrum of **2c**

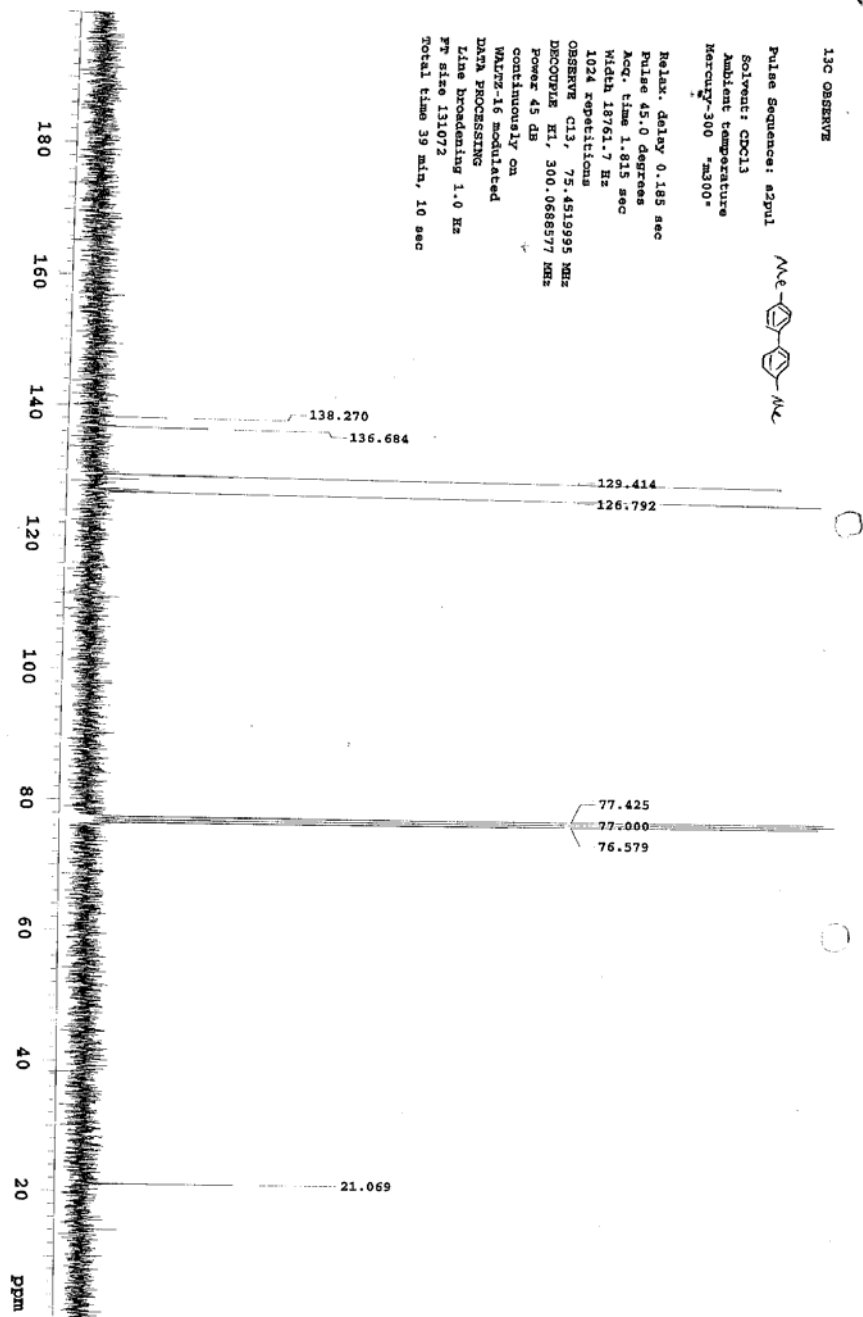

<sup>1</sup>H NMR spectrum of 2d

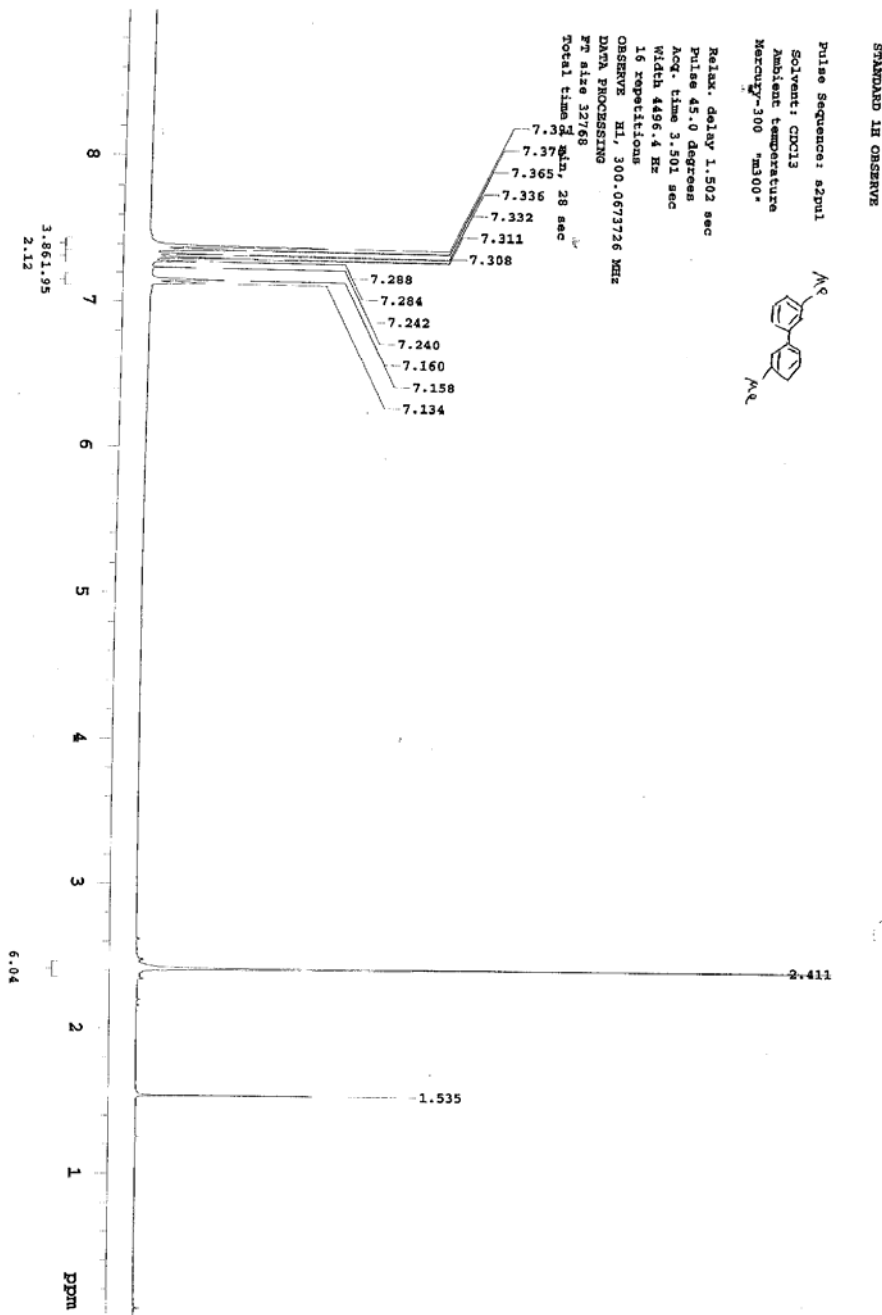

S28

<sup>13</sup>C NMR spectrum of **2d**

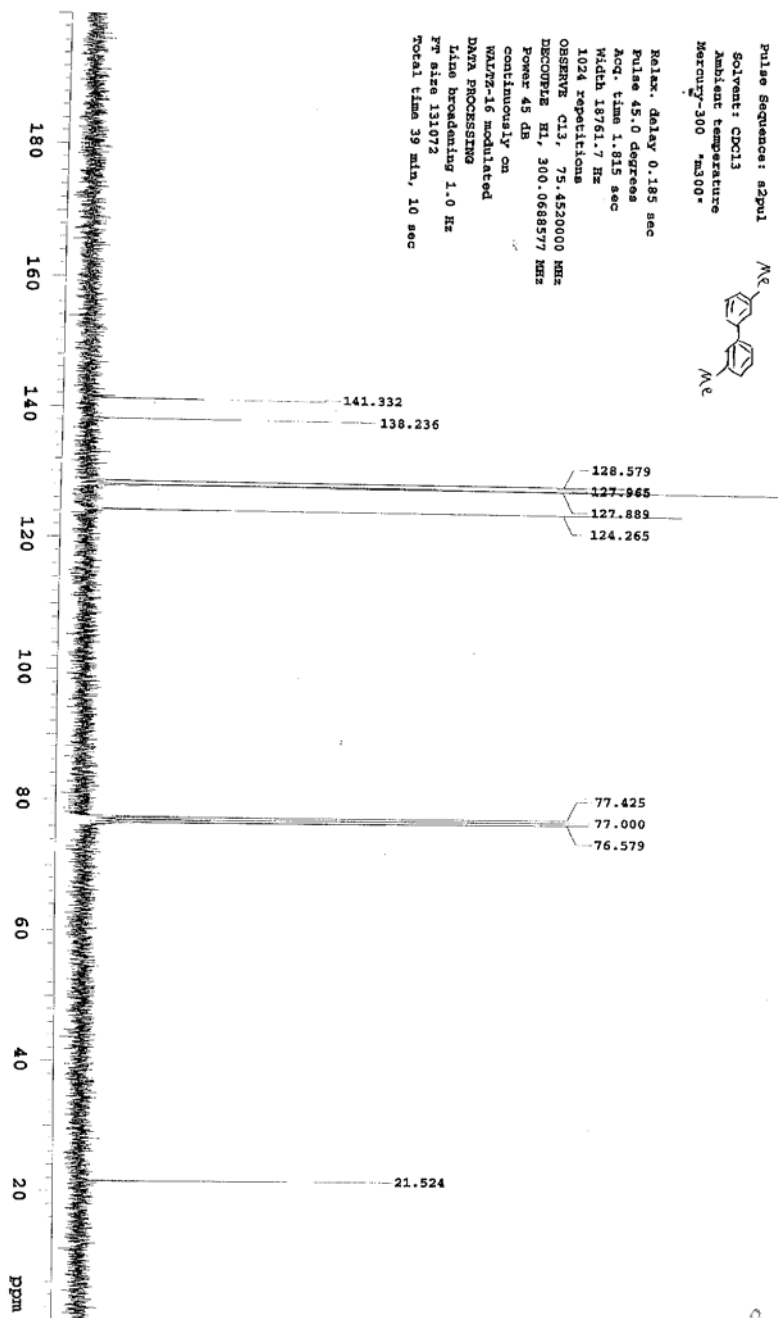

S 19

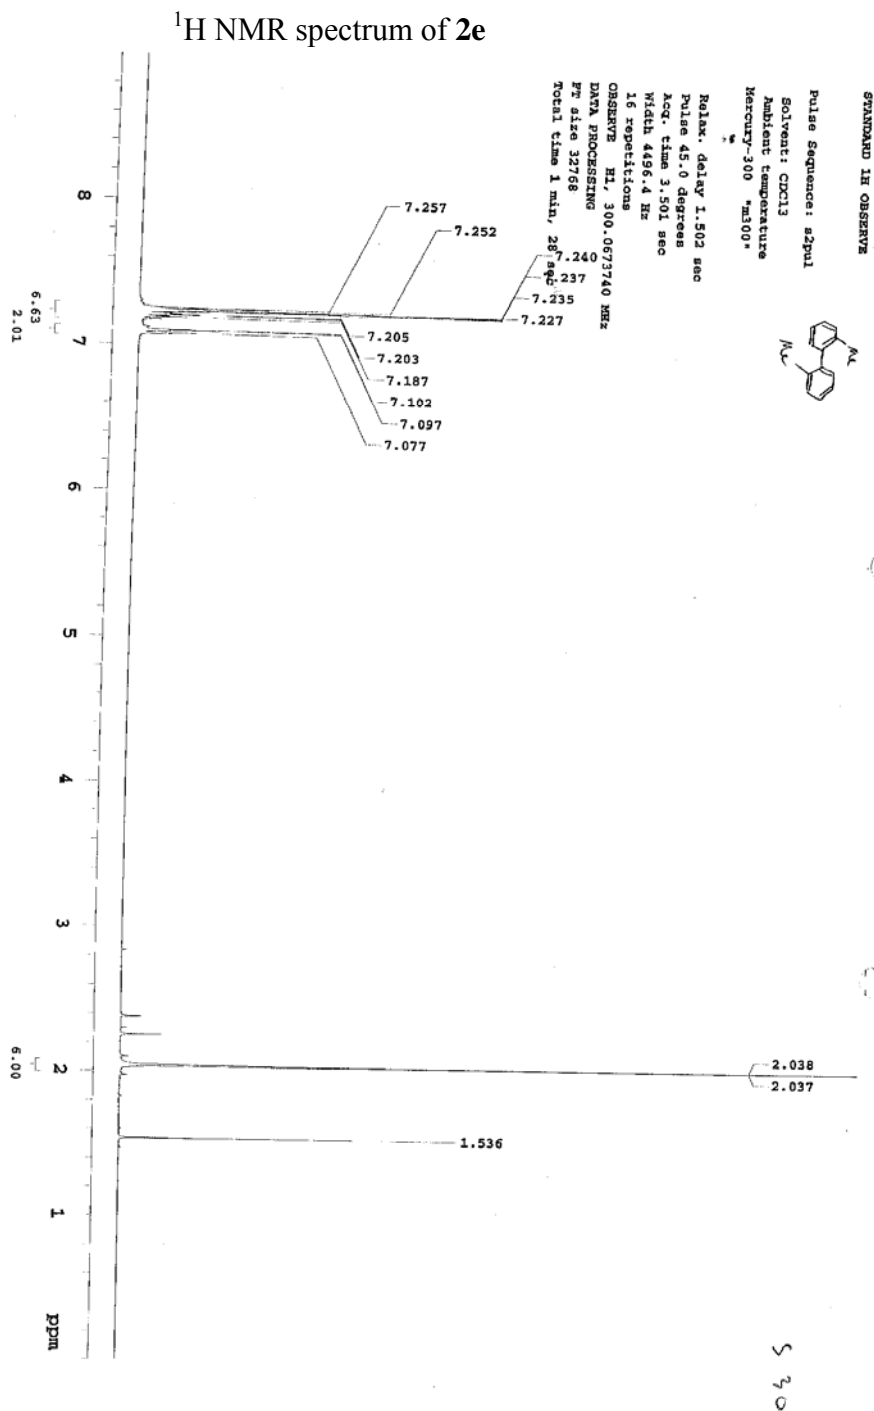



$^{13}\text{C}$  NMR spectrum of **2e**

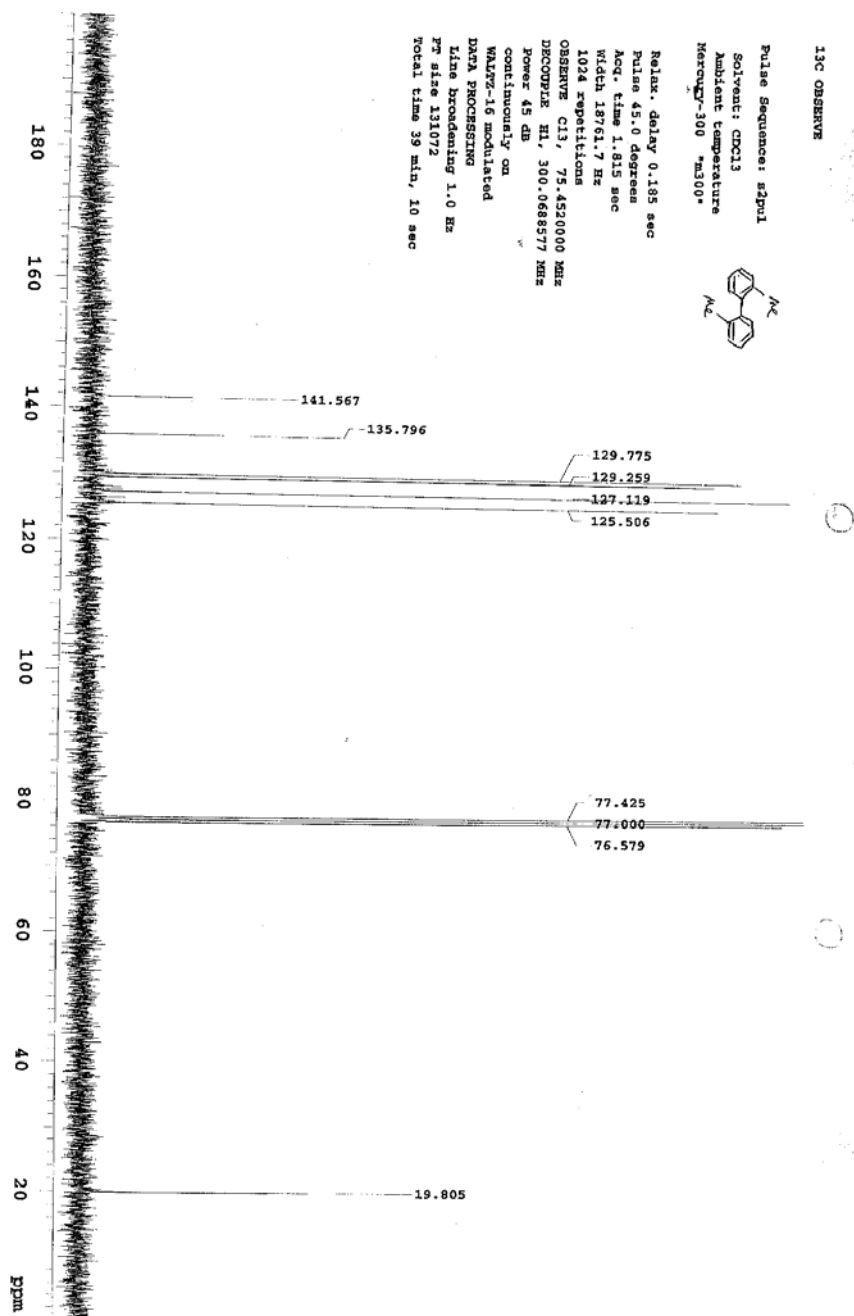

<sup>1</sup>H NMR spectrum of 2f

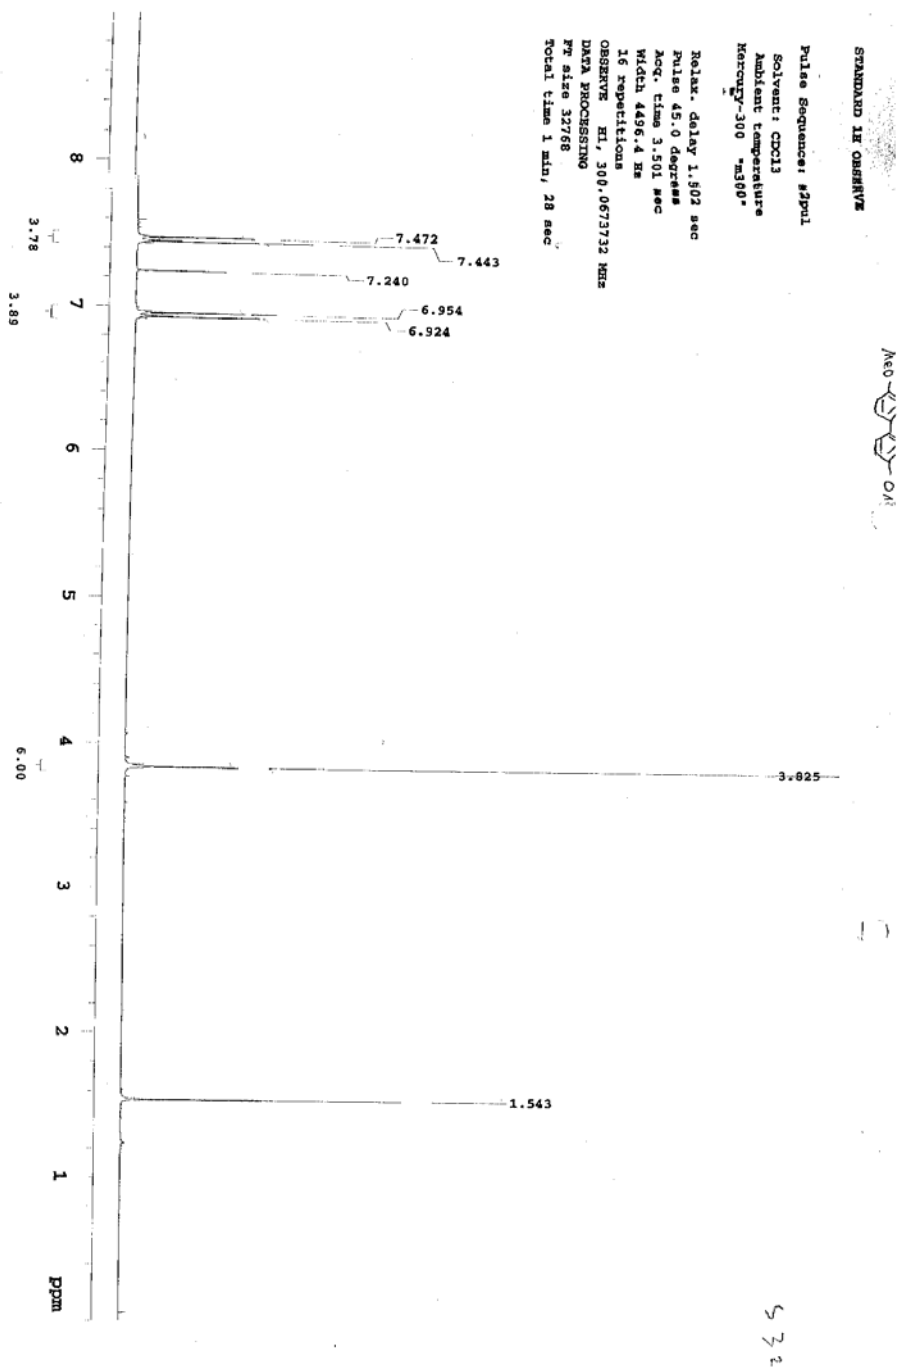

$^{13}\text{C}$  NMR spectrum of **2f**

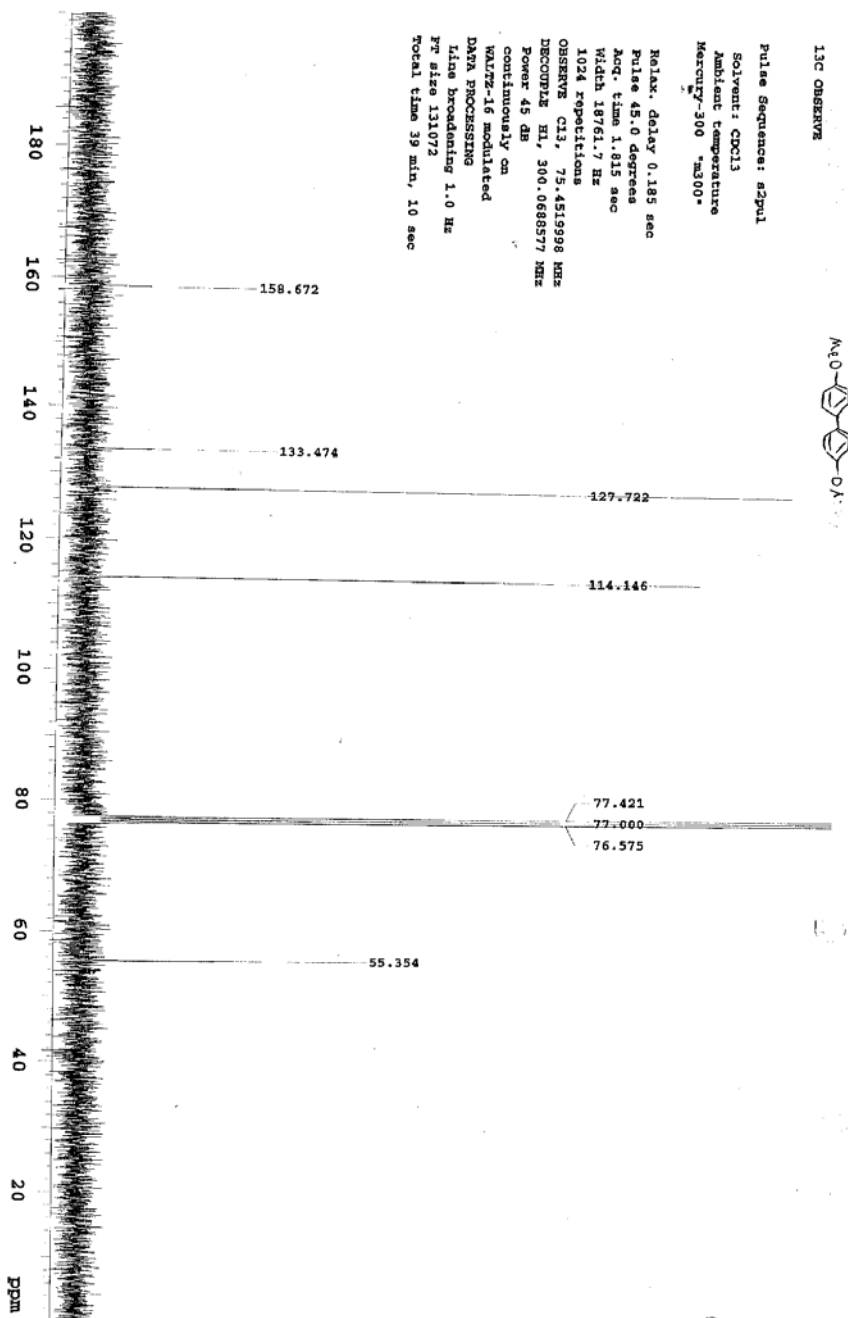

<sup>1</sup>H NMR spectrum of **6b**

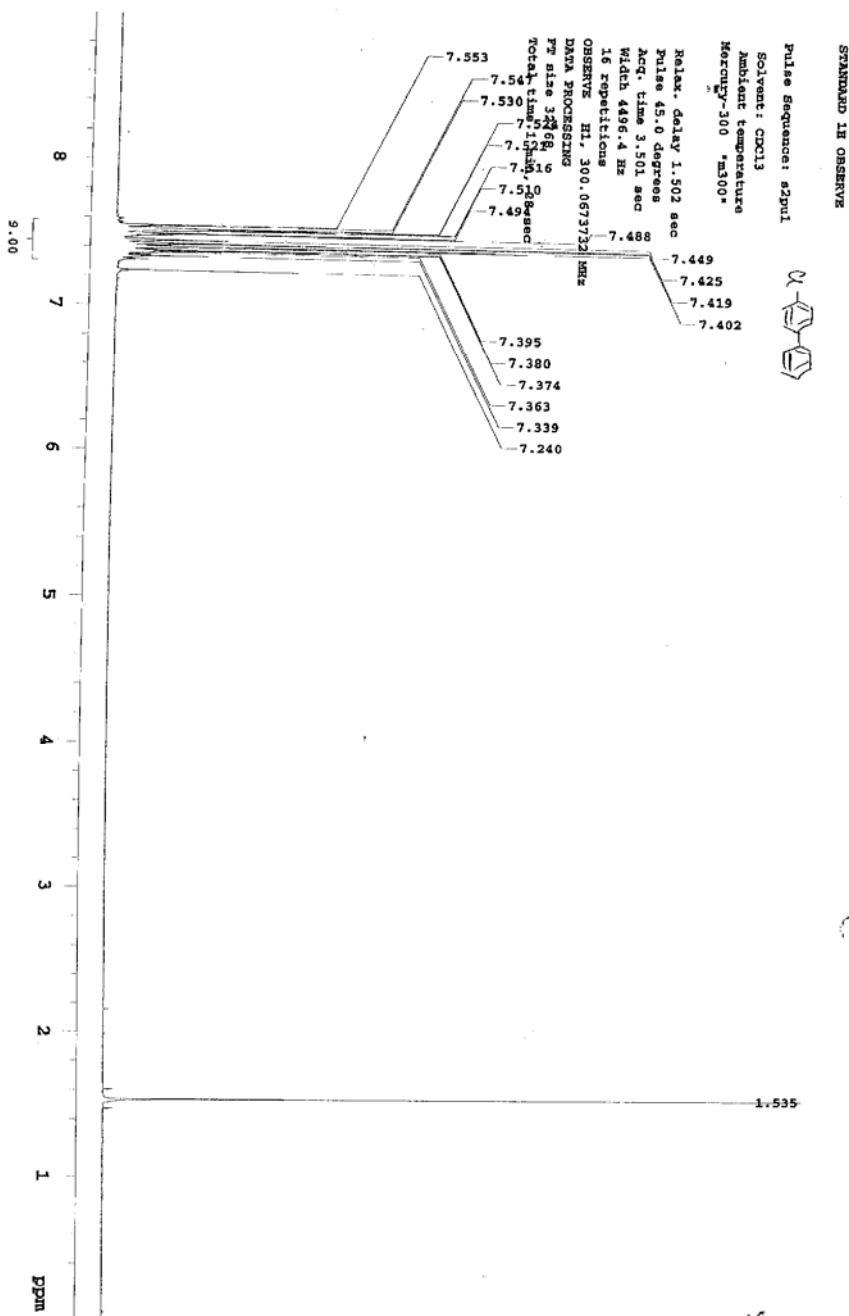

<sup>13</sup>C NMR spectrum of **6b**

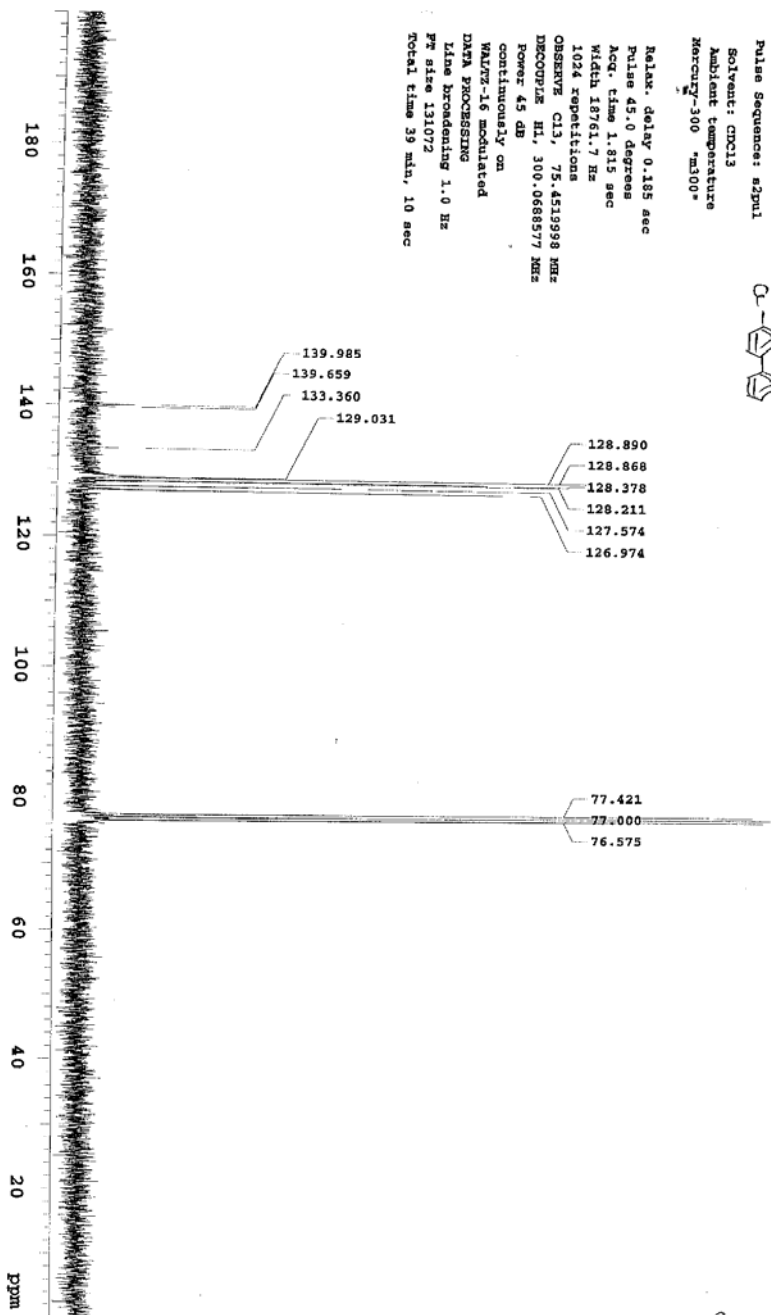

<sup>1</sup>H NMR spectrum of **6c**

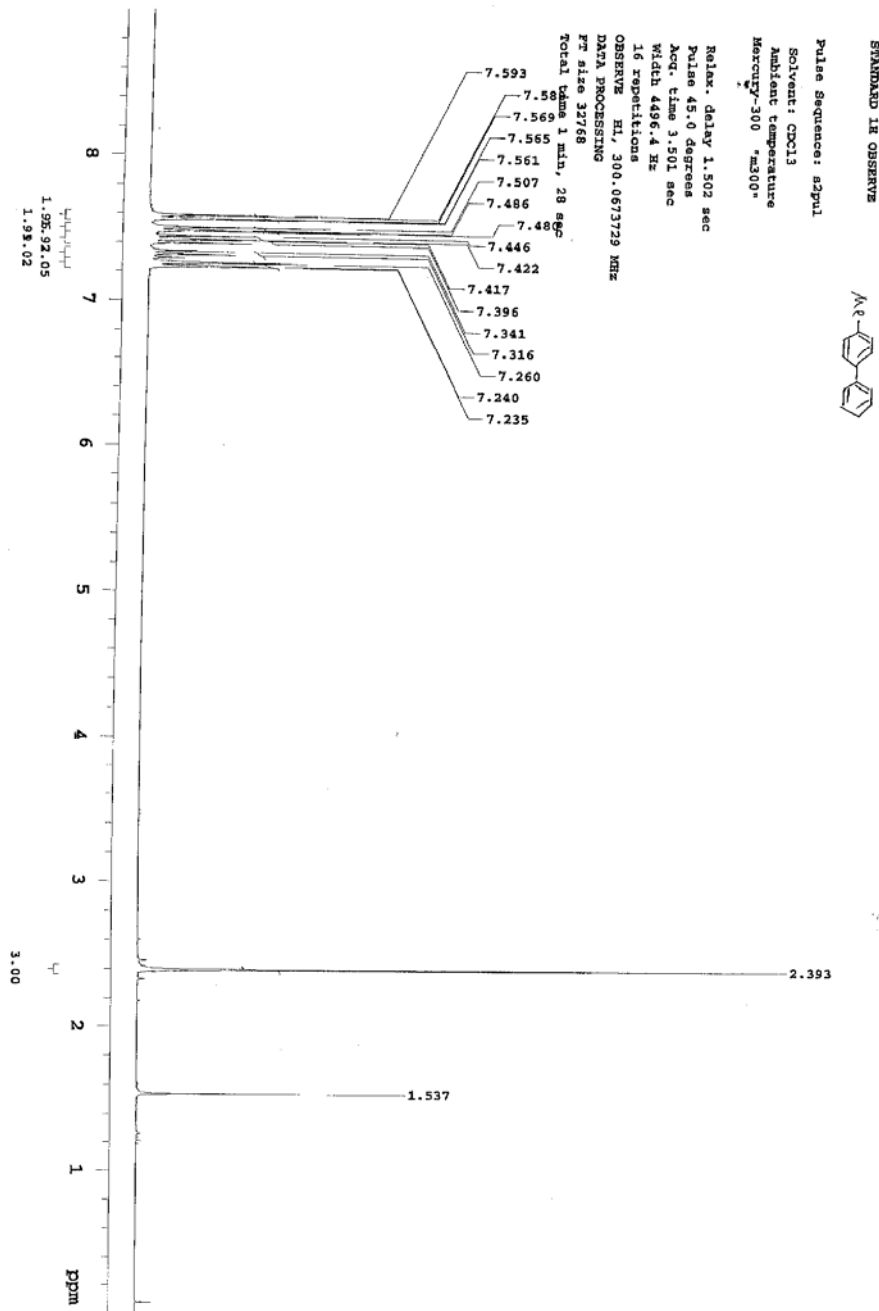

<sup>13</sup>C NMR spectrum of **6c**

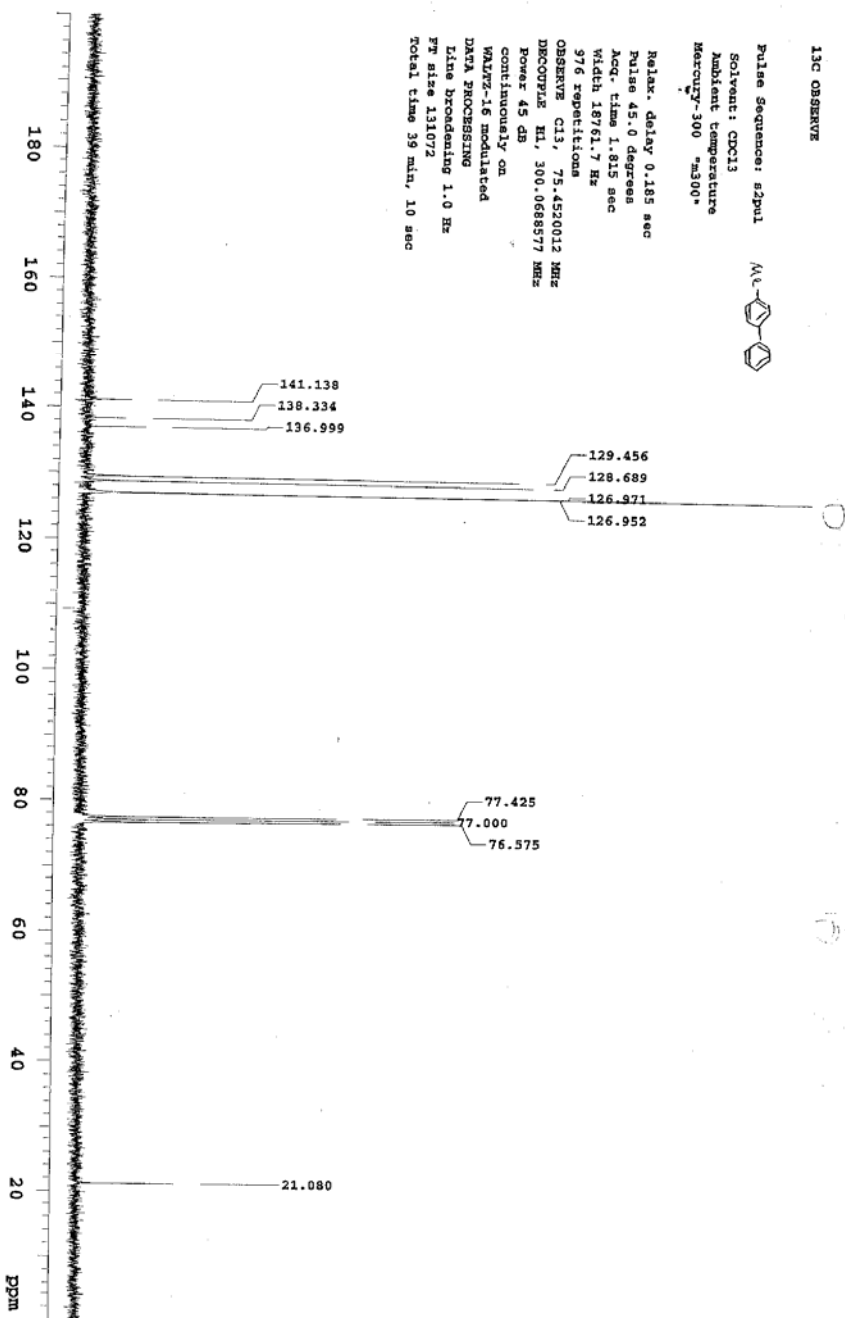

<sup>13</sup>C OBSERVE

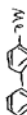

Pulse Sequence: s2pul  
Solvent: CDCl3  
Ambient temperature  
Mercury-300 "M300"

Relax. delay 0.185 sec  
Pulse 45.0 degrees  
Acq. time 1.815 sec  
Width 18761.7 Hz  
976 repetitions

OBSERVE C13, 75.4520012 MHz  
DECODEDPR H1, 300.0688577 MHz  
Power 45 dB  
continuously on  
WALTZ-16 modulated  
DATA PROCESSING  
Line broadening 1.0 Hz  
FM size 131072  
Total time 39 min, 10 sec

537

<sup>1</sup>H NMR spectrum of **6d**

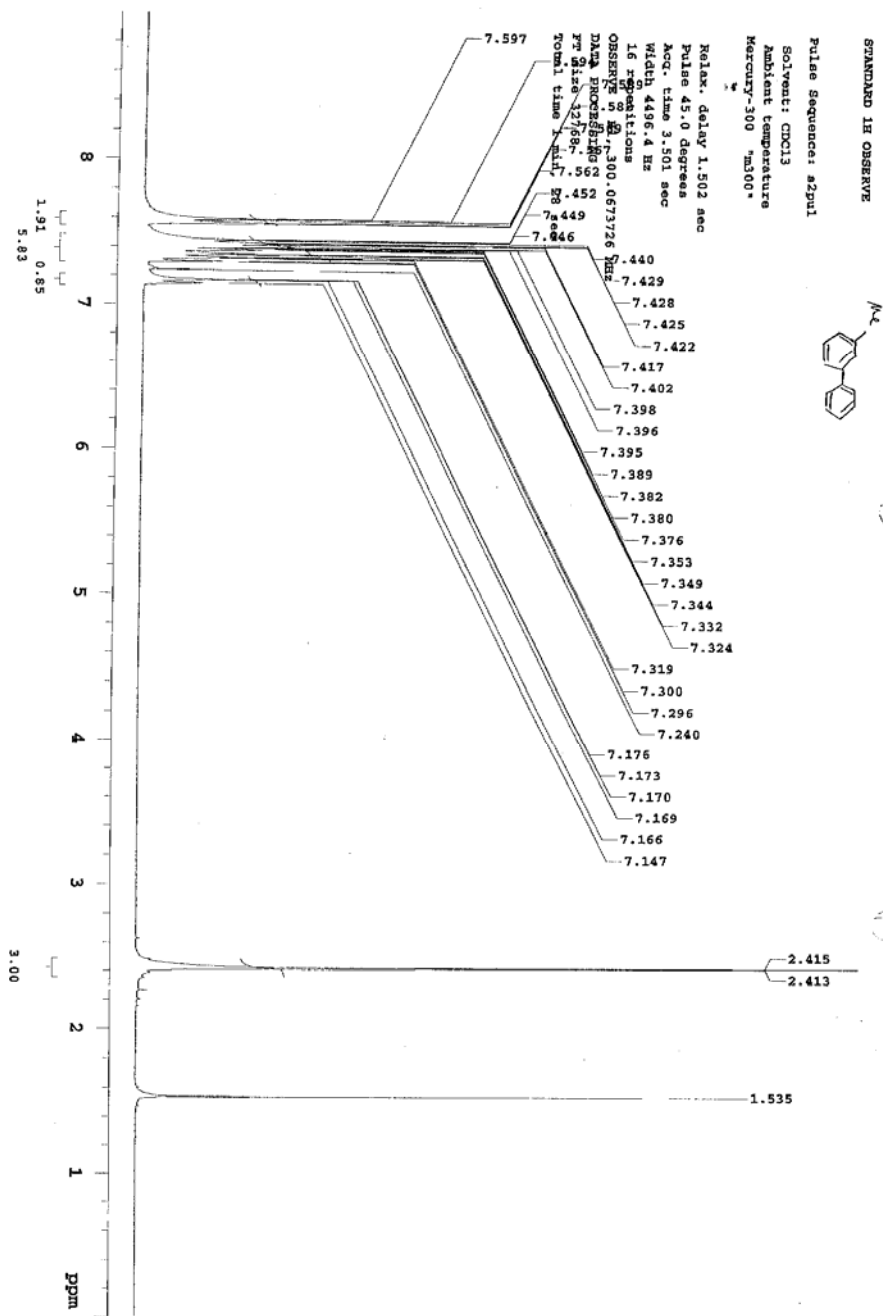



<sup>13</sup>C NMR spectrum of **6d**

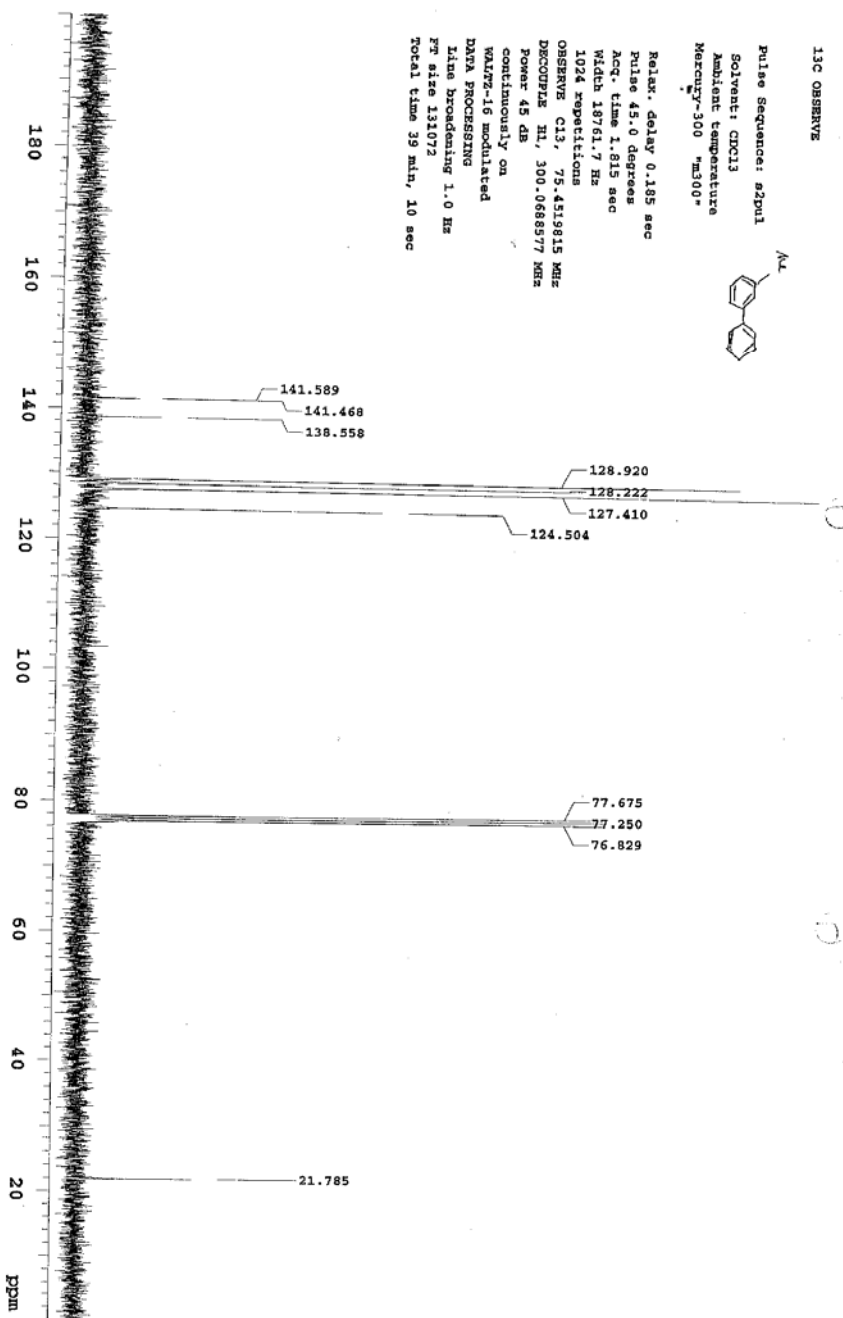

$^1\text{H}$  NMR spectrum of **6e**

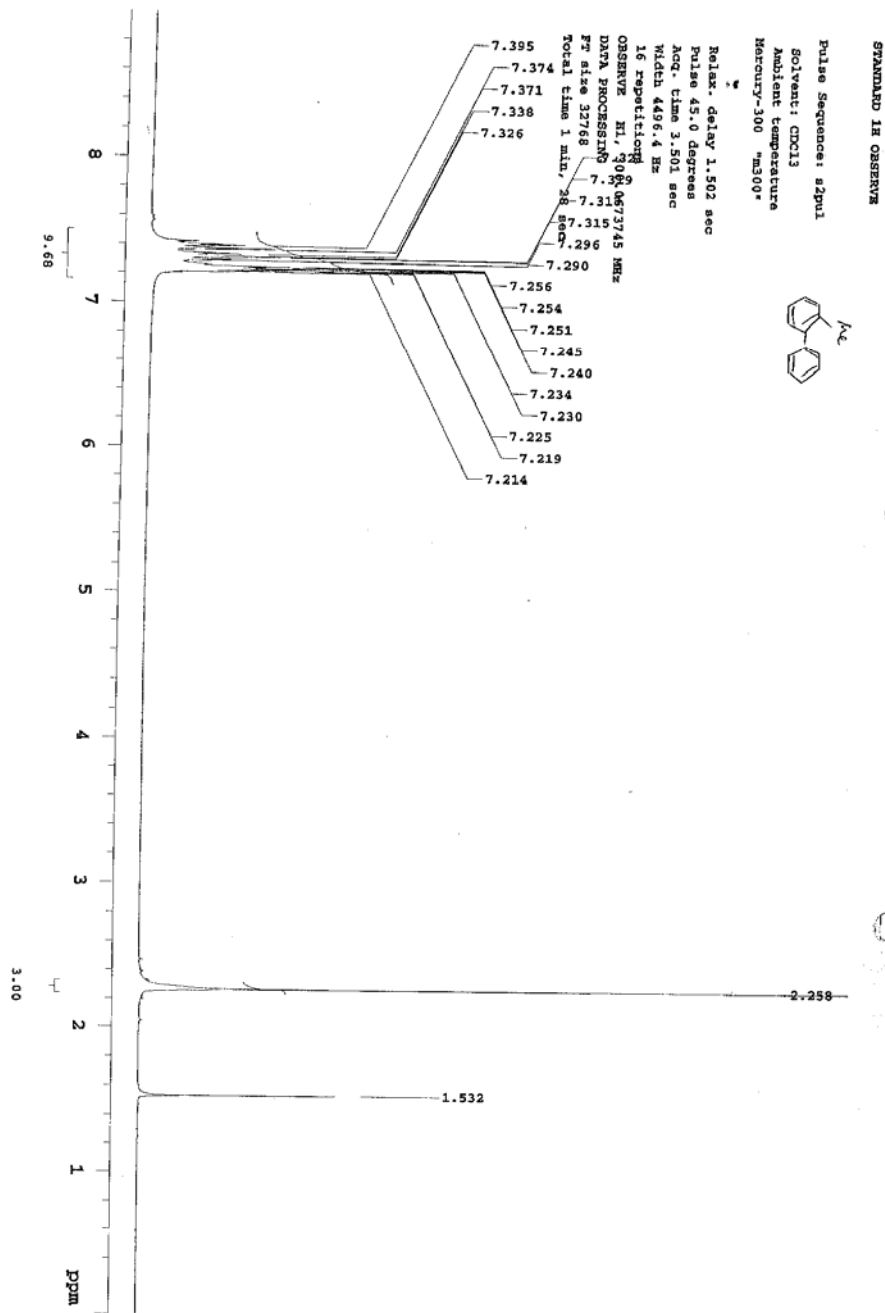

S 40

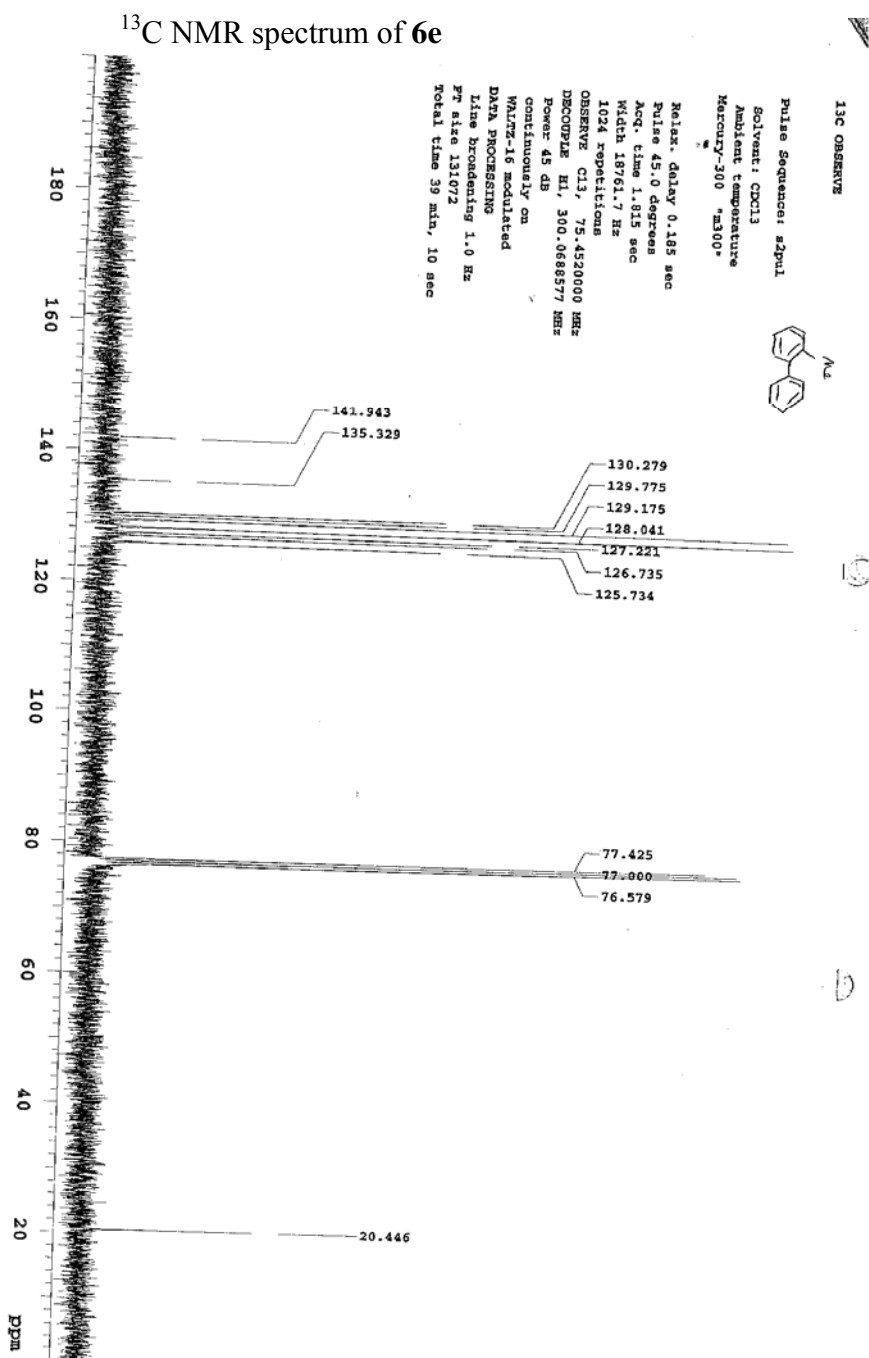



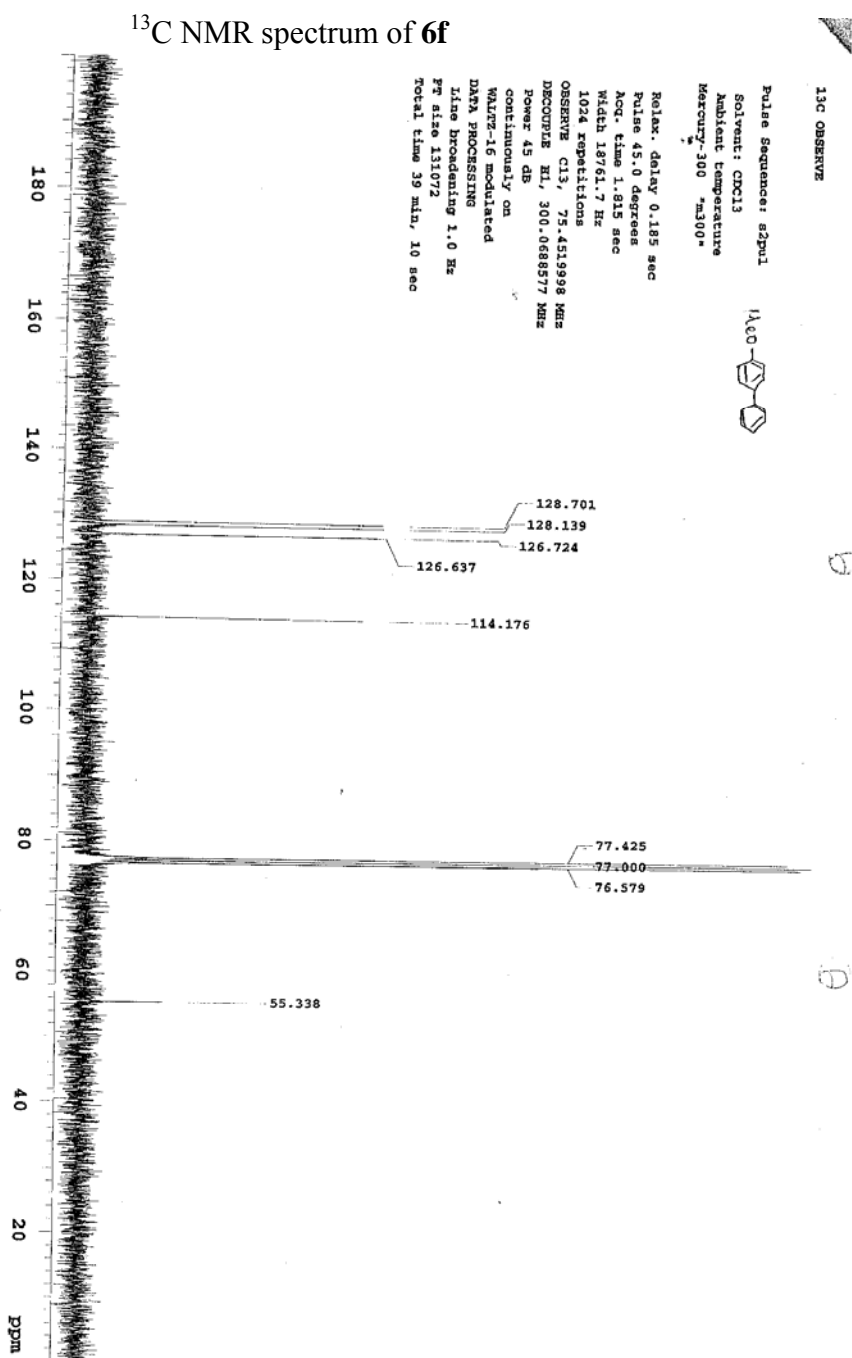

<sup>1</sup>H NMR spectrum of 6g

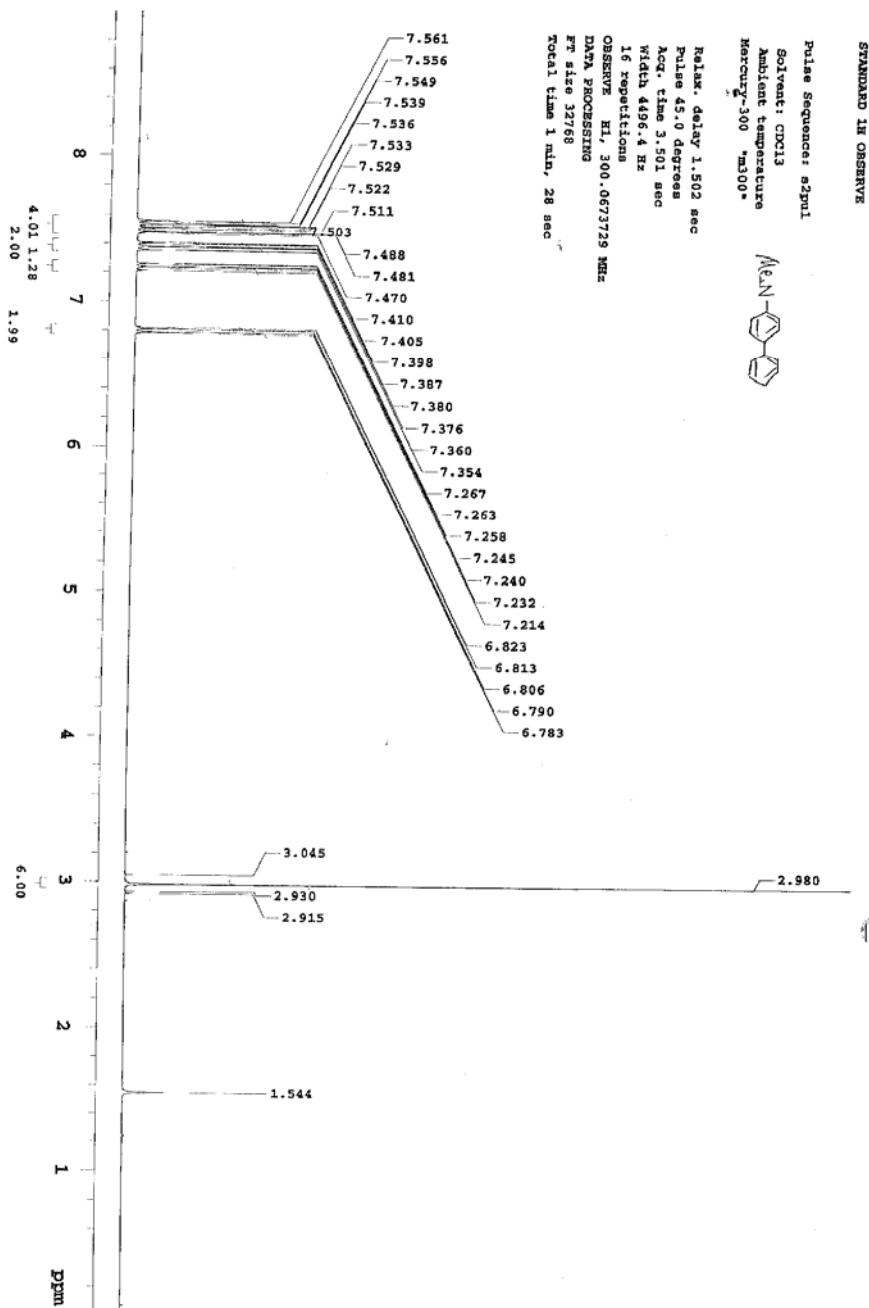

549

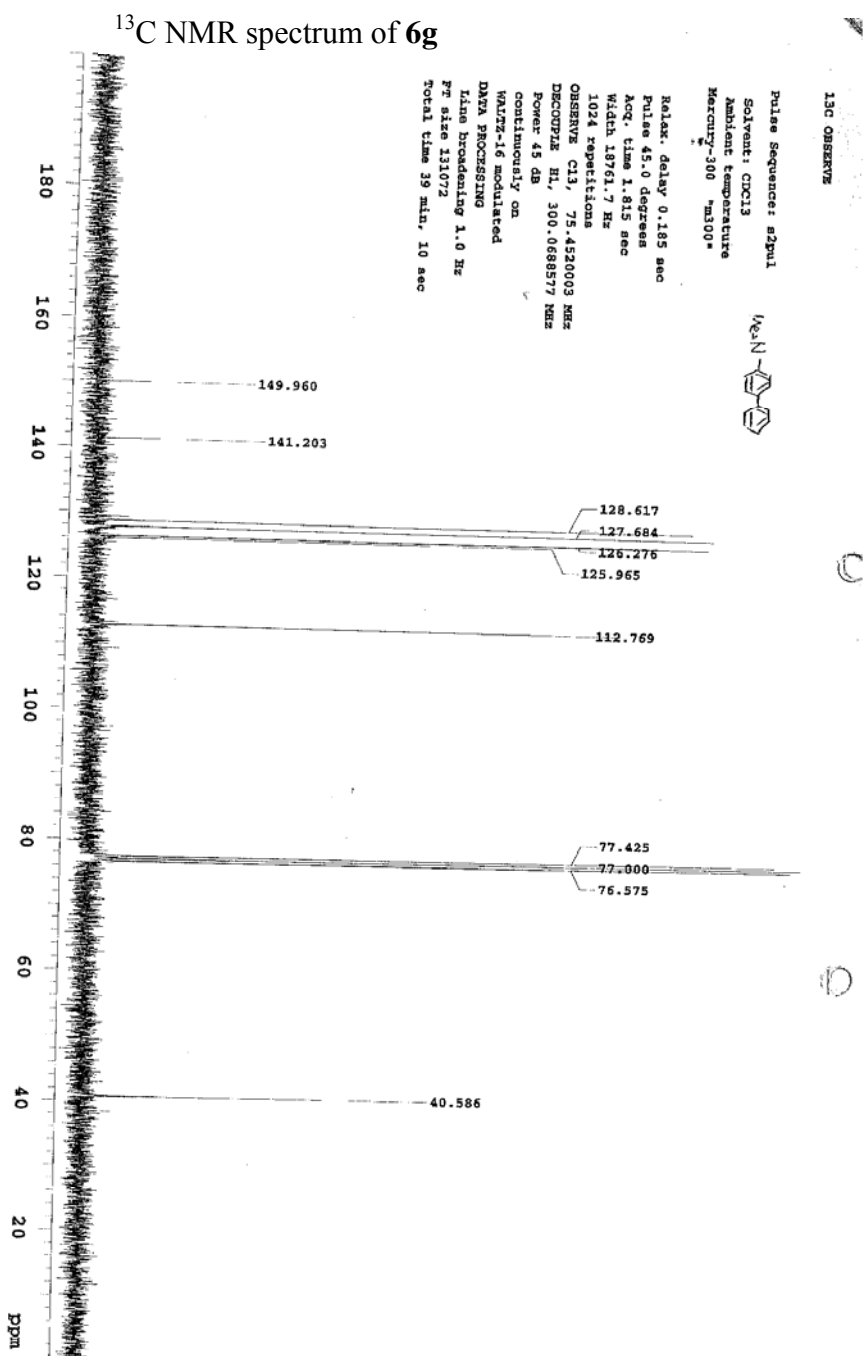

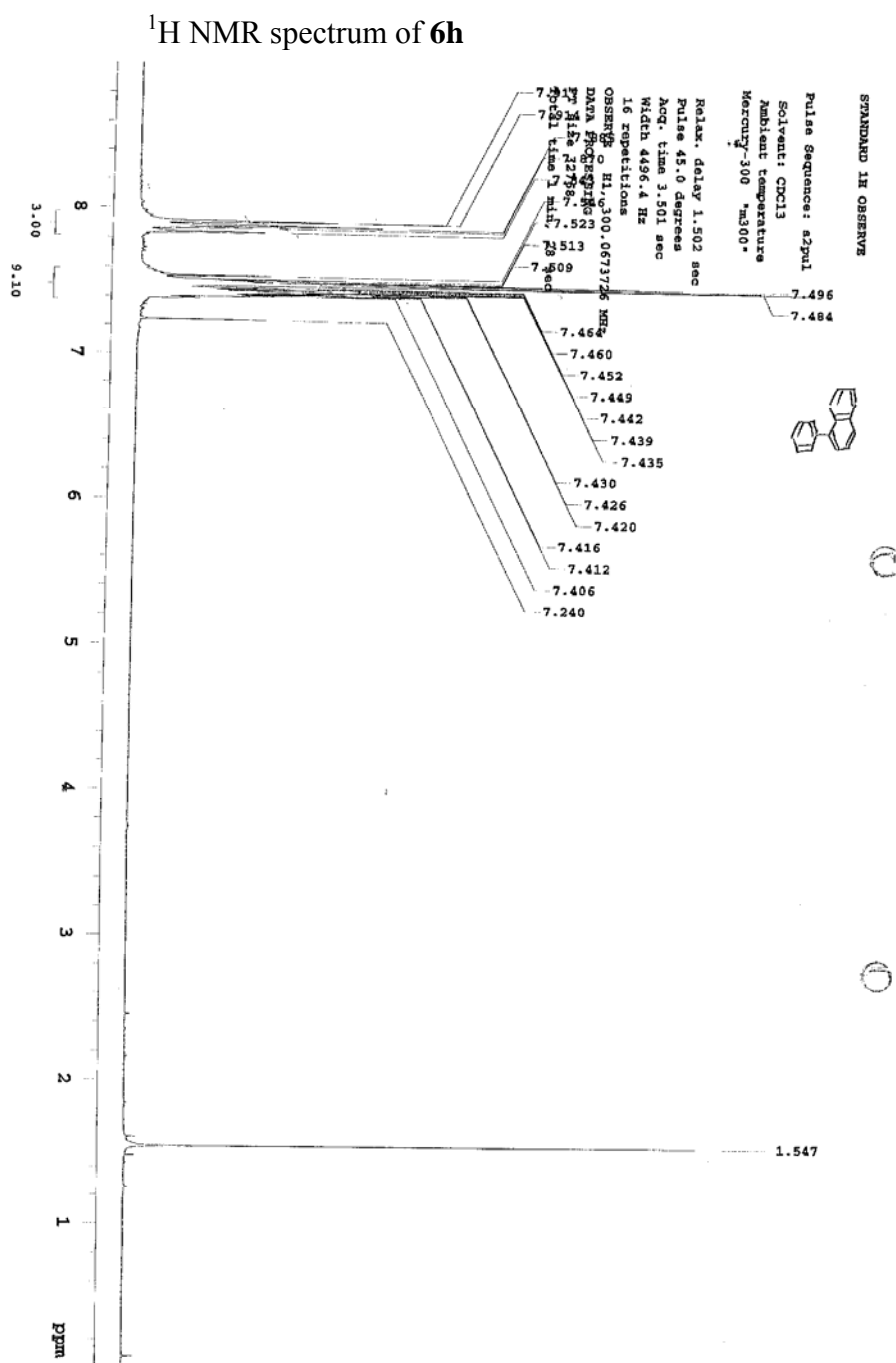

S-16



<sup>13</sup>C NMR spectrum of **6h**

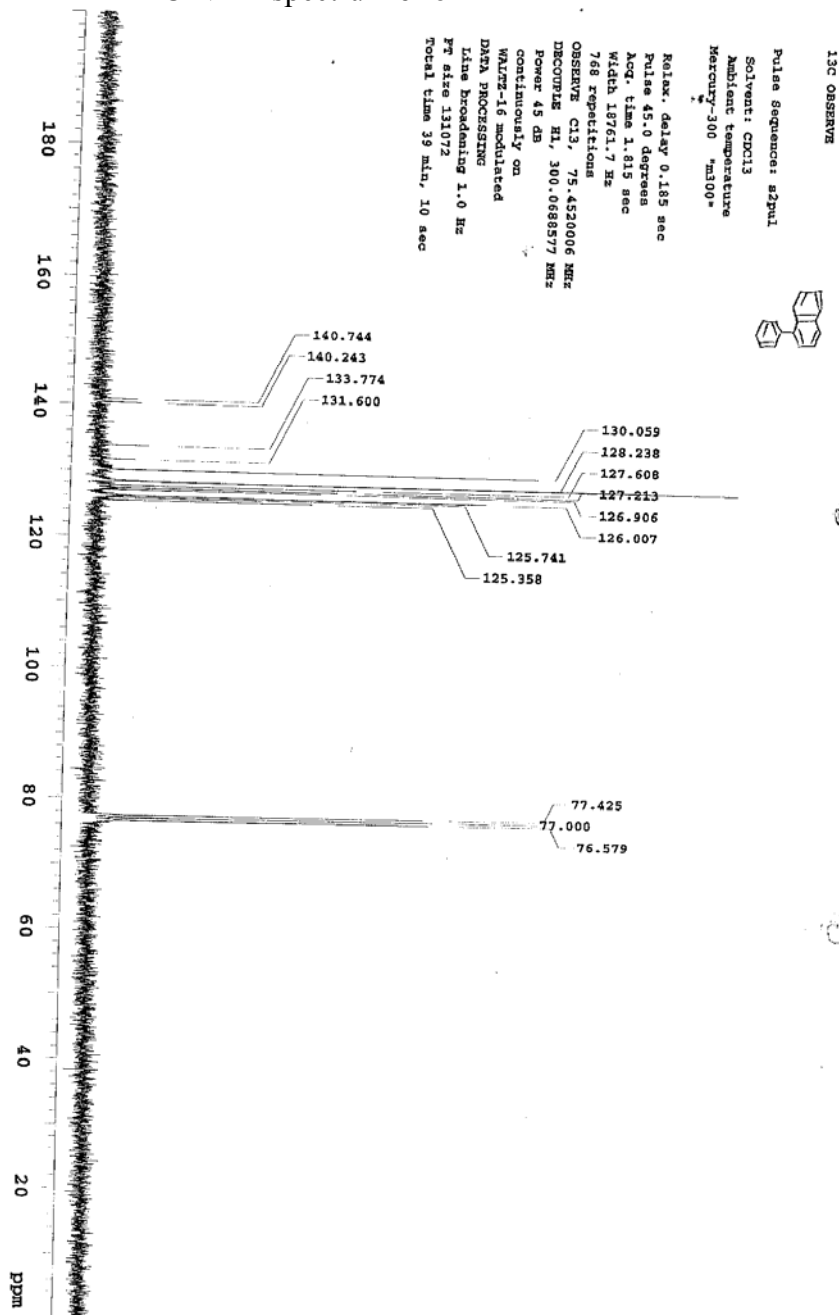



$^{13}\text{C}$  NMR spectrum of **6i**

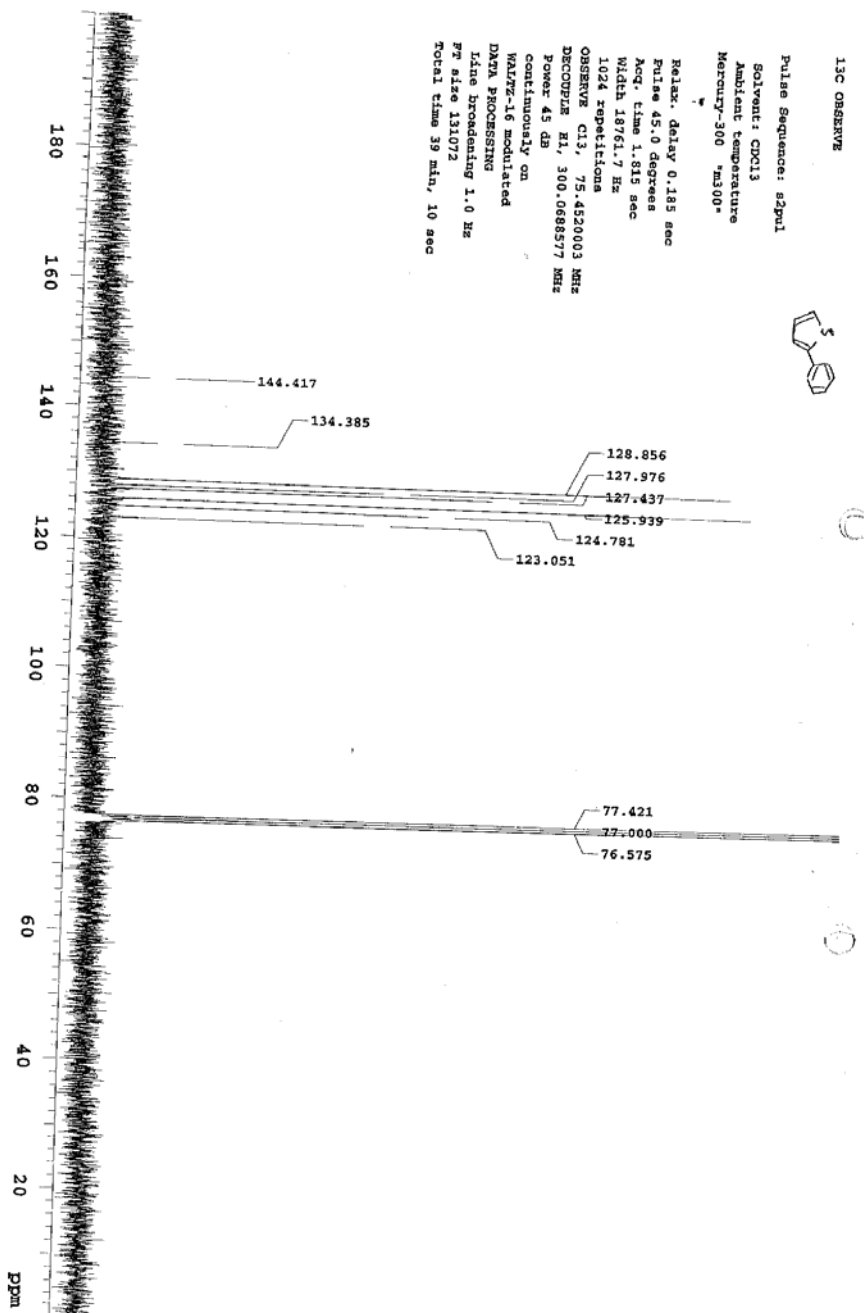

529

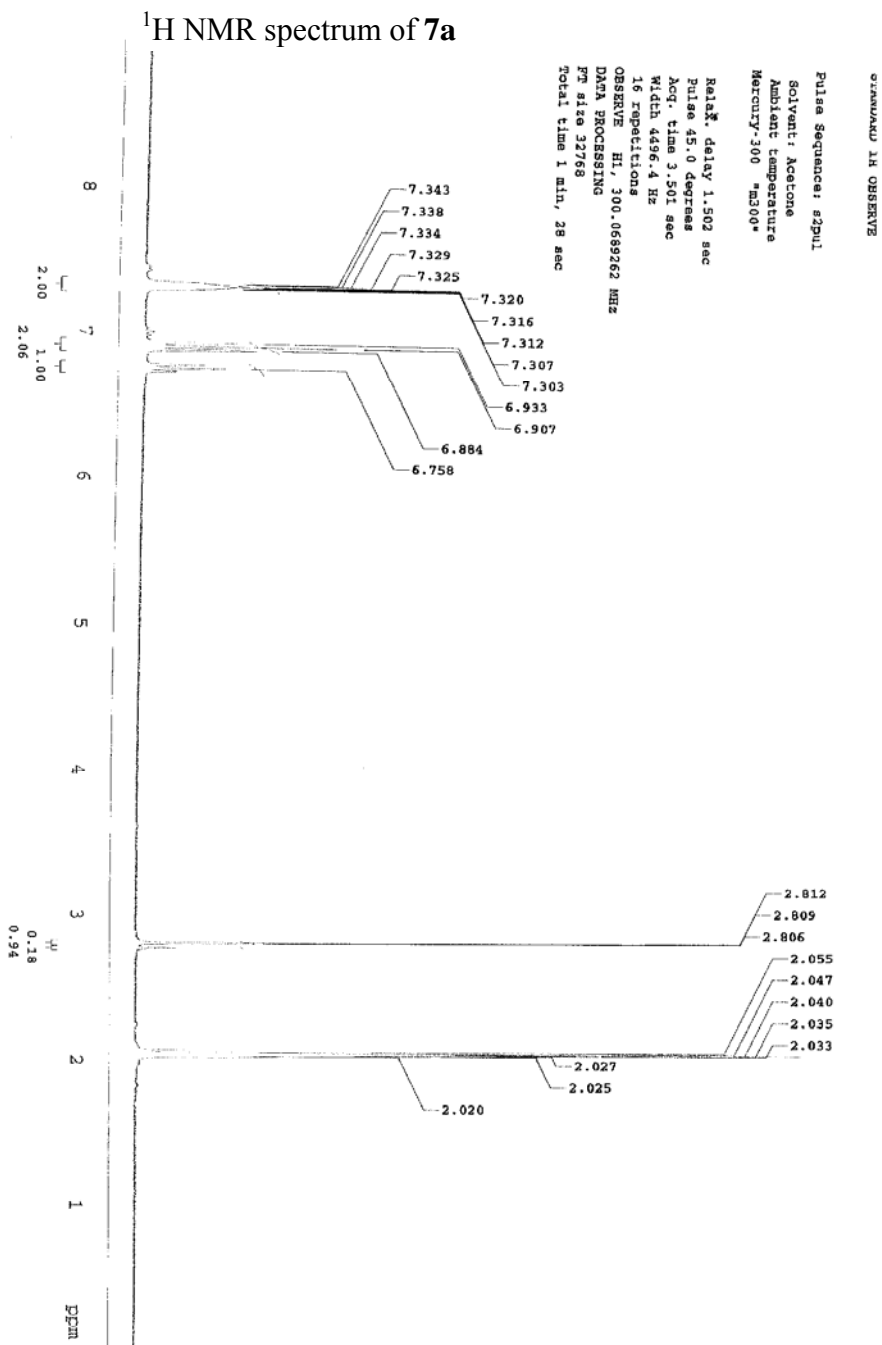

550

ESR spectrum of vanadium(IV) species

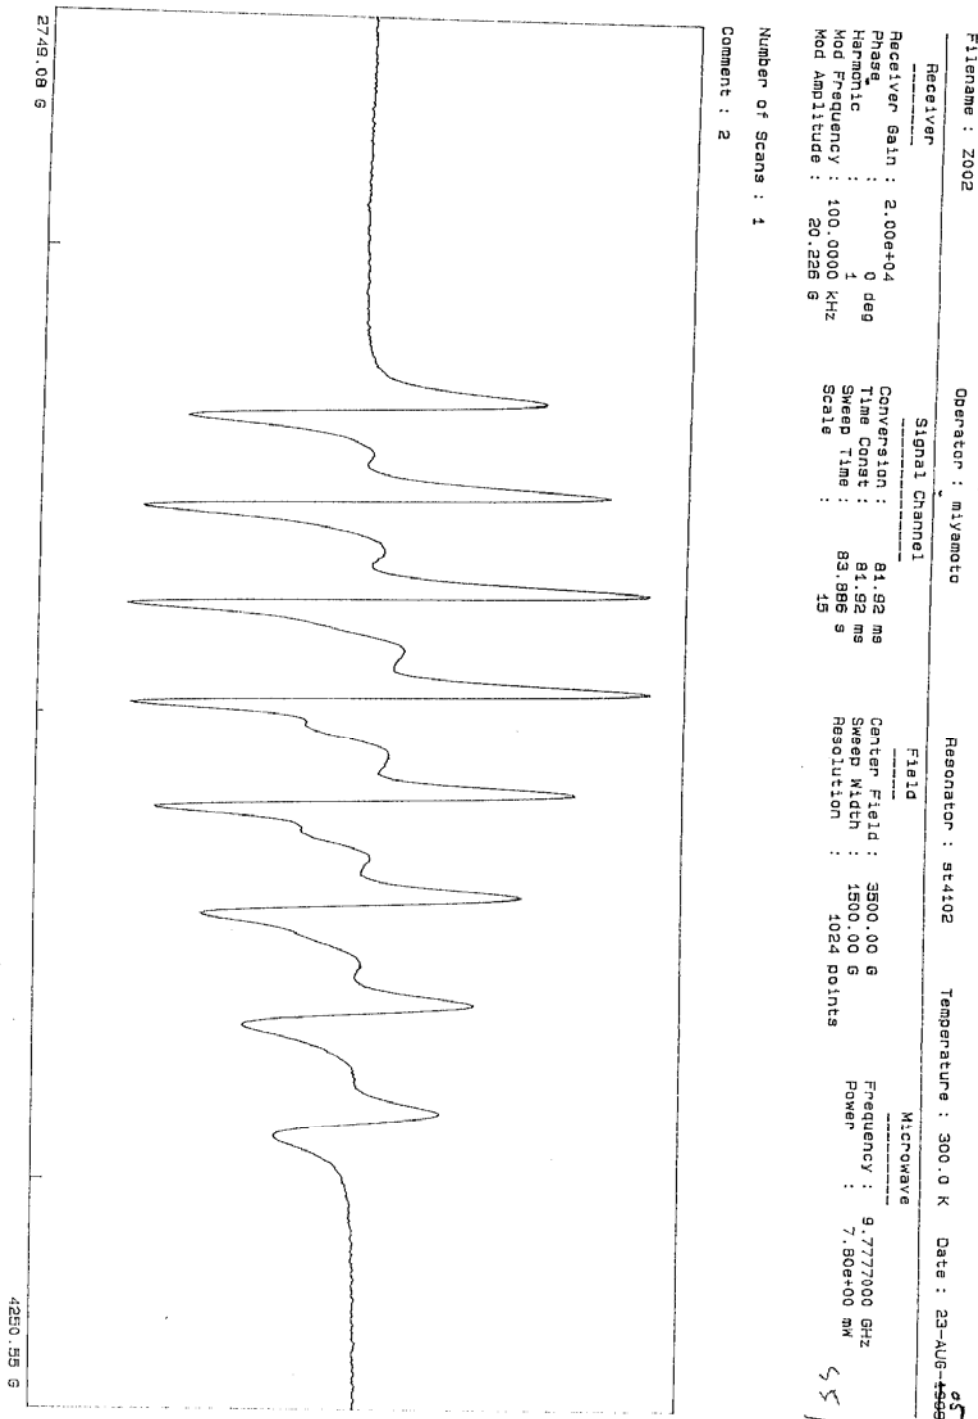

Supplement: b610731a.pdf [file b610731a.pdf]
